# Supplementary material for: Sexual minority population density and incidence of lung, colorectal and female breast cancer in California
Source: PubMed Central journal article supplement — BMJ Open. 2014 Mar 26;4(3):e004461. doi: 10.1136/bmjopen-2013-004461 (PMC3975738; doi:10.1136/bmjopen-2013-004461), 2014-03-26
Supplement: bmjopen-2013-004461.draft_revisions.pdf [file bmjopen-2013-004461.draft_revisions.pdf]

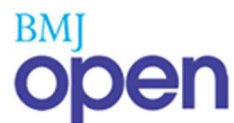

**Sexual Minority Density and Incidence of Lung, Colorectal,  
and Female Breast Cancer in California**

|                                 |                                                                               |
|---------------------------------|-------------------------------------------------------------------------------|
| Journal:                        | <i>BMJ Open</i>                                                               |
| Manuscript ID:                  | bmjopen-2013-004461                                                           |
| Article Type:                   | Research                                                                      |
| Date Submitted by the Author:   | 11-Nov-2013                                                                   |
| Complete List of Authors:       | Boehmer, Ulrike<br>Miao, Xiaopeng<br>Maxwell, Nancy<br>Ozonoff, Al            |
| <b>Primary Subject Heading</b>: | Oncology                                                                      |
| Secondary Subject Heading:      | Oncology, Public health                                                       |
| Keywords:                       | Adult oncology < ONCOLOGY, Breast tumours < ONCOLOGY, Epidemiology < ONCOLOGY |
|                                 |                                                                               |

SCHOLARONE™  
Manuscripts

Peer Review Only

1  
2  
3 **Research Article**

4  
5 **Sexual Minority Density and Incidence of Lung, Colorectal, and Female Breast Cancer in**  
6  
7  
8 **California**

9  
10 Running title: Sexual Minority Density and Incidence

11  
12  
13  
14  
15 Ulrike Boehmer<sup>1\*</sup>, Xiaopeng Miao<sup>2</sup>, Nancy I Maxwell<sup>1</sup>, Al Ozonoff<sup>3</sup>

16  
17  
18 <sup>1</sup> Department of Community Health Sciences, Boston University School of Public Health,  
19  
20 Boston, MA 02118 USA

21  
22 <sup>2</sup> Department of Biostatistics, Boston University School of Public Health, Boston, MA  
23  
24 02118 USA

25  
26  
27 <sup>3</sup> Clinical Research Program, Children's Hospital Boston, 300 Longwood Avenue,  
28  
29 Boston, MA 02215, USA

30  
31  
32  
33  
34 \* Corresponding Author

35  
36 Ulrike Boehmer, Ph.D.

37  
38 Department of Community Health Sciences

39  
40 Boston University School of Public Health

41  
42  
43 801 Massachusetts Avenue, Crosstown Center

44  
45  
46 Boston, MA 02118

47  
48  
49 USA

50  
51  
52 Phone 617-638-5835

53  
54  
55 Fax 617-638-4483

56  
57  
58 Email [boehmer@bu.edu](mailto:boehmer@bu.edu)

**ABSTRACT**

Objective: Risk factors for breast, colorectal, and lung cancer are known to be more common among lesbian, gay, and bisexual (LGB) individuals, suggesting they may more likely develop these cancers. Our objective was to determine differences in cancer incidence by sexual orientation, using aggregate sexual orientation data.

Methods: Data on cancer incidence were obtained from the California Cancer Registry and data on sexual orientation were obtained from the California Health Interview Survey, from which a measure of age-specific LGB density by county was calculated. Using multivariable Poisson regression models the association between the age-race-stratified count of incident breast, lung, and colorectal cancer cases in each county and LGB density was examined, with race, age group, and poverty as covariates.

Results: Among males, bisexual density was associated with lower incidence of lung cancer and with higher incidence of colorectal cancer. Among females, lesbian density was associated with lower incidence of lung and colorectal cancer, and with higher incidence of breast cancer; bisexual density was associated with higher incidence of lung and colorectal cancer, and with lower incidence of breast cancer.

Conclusions: These study findings clearly document links between county-level LGB density measures and cancer incidence, illuminating an important public health disparity.

Keywords: Homosexuality, cancer incidence, breast cancer, colorectal cancer, lung cancer, disparities, sex differences

**ARTICLE SUMMARY**

**Strengths and limitations of this study**

- Variation in cancer incidence due to sexual orientation aggregated at the county-level point to differences by sexual orientation group.
- These county-level differences in cancer incidence provide information for public health planning, previously unavailable.
- Determining whether disparities exist in cancer incidence due to sexual orientation is not possible otherwise, because cancer registries do not document sexual orientation.
- Study findings have the inherent limitations of the ecologic study design.
- Because data are at the county level, it is not possible to link sexual minority status to cancer risk at the level of the individual.

## INTRODUCTION

Lung, colorectal, and female breast cancer are three of the most commonly diagnosed cancers in the United States, with incidence rates of 79.5, 51.6, and 121.9 per 100,000, respectively, in 2008. [1] Smoking and alcohol use are well-known risk factors for all three of these cancers; overweight and/or obesity has been linked to risk of female breast cancer and colorectal cancer. [2] In addition, nulliparity is associated with increased risk of female breast cancer.

Research also indicates that the prevalence of these well-known risk factors is generally higher among sexual minority individuals—that is, lesbian, gay, and bisexual individuals. Smoking is more common among sexual minorities, both men and women, than among their heterosexual counterparts.[3-8] Further, in 2007 the President’s Cancer Panel found that sexual minority youths smoke at rates as high as those of adults, and tend to start smoking at a younger age than heterosexual youths.[6] Sexual minority women are more likely than heterosexual women to drink alcohol [5, 8-12] and to be overweight or obese.[10, 13-16] In contrast, gay men’s alcohol use has not been shown to differ from that of heterosexual men,[12] and gay men are less likely than heterosexual men to be overweight or obese. [17] Finally, sexual minority women have higher rates of nulliparity than heterosexual women. [10, 13, 14, 18-20]

Because cancer registries do not collect information on the sexual orientation of individuals diagnosed with cancer, it cannot be readily determined from SEER or state registry data whether cancer is more prevalent among individuals with a sexual minority orientation. To overcome this lack of data on cancer disparities by sexual orientation, three previous studies used county-level ecologic analyses to relate breast, lung, and colorectal cancer incidence to greater density of sexual minority individuals [21-23]. Using SEER registry data and US Census data on

1  
2  
3 the prevalence of same-sex partnered households as the proxy measure for sexual minority  
4  
5 orientation, these ecological studies concluded that greater female sexual minority density  
6  
7 (SMD) in a county is associated with greater incidence of breast and colorectal cancer [21, 22],  
8  
9 while there was a negative relationship between female sexual minority density and lung cancer  
10  
11 incidence [23]. Greater density of sexual minority men was associated with higher incidence of  
12  
13 lung and colorectal cancer [22, 23].  
14  
15

16  
17 While US census data are a well-established proxy for sexual orientation, these data also  
18  
19 have known limitations. From available Census data, we can enumerate households led by same-  
20  
21 sex adults, but this surely represents an undercount since we capture only sexual minority  
22  
23 individuals who live with a same-sex partner, thereby excluding sexual minority individuals who  
24  
25 are living alone or with non-partners. Further, we do not know how many members of a same-  
26  
27 sex partnered household identify as lesbian, gay, or bisexual. In particular, it is impossible to  
28  
29 assess lesbians separately from bisexual women or to assess gay men separately from bisexual  
30  
31 men. This is an important limitation, because studies that analyzed lesbian women separately  
32  
33 from bisexual women concluded bisexuals fare worse on some health indicators than both  
34  
35 heterosexual and lesbian women [24-27].  
36  
37  
38  
39

40  
41 To address the limitations of US Census data, the present study traded a national scope  
42  
43 for an improved measure of sexual minority density. We used statewide population-based data  
44  
45 on sexual minority identity (gay, lesbian, or bisexual) to estimate its relationship to colorectal  
46  
47 cancer, lung cancer, and female breast cancer incidence.  
48  
49  
50

## 51 **MATERIALS AND METHODS**

52  
53  
54 The Institutional Review Board deemed this study exempt from protocol review. Data for  
55  
56 this research project were taken from the California Health Interview Survey (CHIS), the largest  
57  
58  
59  
60

1  
2  
3 state health survey conducted in the US. The CHIS employs a two-stage geographically stratified  
4  
5 random-digit-dial (RDD) sample of households, surveying one randomly selected adult from  
6  
7 each sampled household. The survey is administered in multiple languages, resulting in a large  
8  
9 multiethnic/multiracial sample that accurately represents the California population living in  
10  
11 households. The CHIS response rate shows no significant nonresponse bias by demographic  
12  
13 characteristics such as age, sex, income, education, or employment status [28]; however, due to  
14  
15 the absence of a sampling frame, nonresponse by sexual orientation has not been evaluated.  
16  
17 More detailed information about the survey methodology can be obtained from the website:  
18  
19 <http://www.chis.ucla.edu/>. The CHIS collects information biennially, including data on sexual  
20  
21 orientation. To ascertain sexual orientation, respondents were asked about their sexual identity,  
22  
23 with response choices of heterosexual, lesbian, gay, or bisexual along with celibate or other,  
24  
25 while recording refusals and don't know responses. We combined four years of data, using the  
26  
27 adult CHIS surveys from 2001, 2003, 2005, and 2007 to increase the numbers of individuals who  
28  
29 report a sexual minority orientation, defined as gay, lesbian, or bisexual.  
30  
31  
32  
33  
34  
35

36 Data on cancer incidence were taken from the California Cancer Registry, which records  
37  
38 all cancer cases to monitor the occurrence of cancer among Californians. We chose the cancer  
39  
40 data for the years 2001-2008 because these years cover the same timeframe as the CHIS sexual  
41  
42 minority data. We further restricted our data to men and women aged 18 to 84, because we  
43  
44 focused on adult cancers and also because this is the age range for which the CHIS had sexual  
45  
46 orientation data available. In 2001-2008, among women aged 18-84 in the 58 counties of  
47  
48 California, 206,012 were newly diagnosed with breast, 59,182 with lung, and 50,123 with  
49  
50 colorectal cancer. Over the same number of years, among men aged 18-84, there were 62,673  
51  
52 new diagnoses of lung cancer and 55,624 of colorectal cancer.  
53  
54  
55  
56  
57  
58  
59  
60

1  
2  
3 Because there are differences in cancer incidence by age and race, we used the population  
4 data from Census 2000 since it has age- and race- specific population data available for all the 58  
5 counties in California. From the Census we also obtained county-level data on poverty, another  
6 important confounder of cancer incidence.  
7  
8  
9  
10  
11

## 12 13 **Measures**

14  
15  
16 Counts of breast, lung, and colorectal cancer incidence were classified into one of 11 age  
17 categories and four race/ethnicity groups. The 11 age categories were 18-24, 25-29, 30-34, 35-  
18 39, 40-44, 45-49, 50-54, 55-59, 60-64, 65-69 and 70-84, while race and ethnicity consisted of (1)  
19 Non-Hispanic White, (2) Hispanic, (3) Asian/Pacific Islander, and (4) other race/ethnicity. The  
20 group of other race/ethnicity combines non-Hispanic Blacks (6.79% of cancers), other/unknown  
21 race/ethnicity (0.73% of cancers) and non-Hispanic American-Indian (0. % of cancers). We  
22 calculated each cancer incidence rate using the total female and male population between age 18  
23 and 84 in each county using the Census data.  
24  
25  
26  
27  
28  
29  
30  
31  
32  
33  
34

35 Our main independent variable is derived from CHIS data on participants' sexual  
36 orientation. We are using these data aggregated at the county-level and call this aggregate  
37 variable 'sexual minority density' (SMD) because it expresses the variation in the density with  
38 which residents of a county report as sexual minorities. To make these data age-specific, we  
39 obtained the distribution of sexual minorities, defined as lesbians, gays, or bisexuals, across  
40 different age groups, and combined this information with the county-level SMD. Specifically, we  
41 obtained the weighted percentage of gay men in a specific age group (denoted as  
42 `ageweight_gay`), using the age information on all gay men in the 58 California counties. Then,  
43 we obtained the weighted percentage of all men in the specific age group (denoted as  
44 `ageweight_all`), using the age information on all subjects in the 58 California counties. Finally,  
45  
46  
47  
48  
49  
50  
51  
52  
53  
54  
55  
56  
57  
58  
59  
60



we obtained the count of all adult gay men (N<sub>gay</sub>) and the count of all adult men (N<sub>all</sub>) in the specific age group, and computed the age-specific gay density as:

$$\text{Age-specific gay density} = \frac{N_{\text{gay}} \times \text{ageweight}_{\text{gay}}}{N_{\text{all}} \times \text{ageweight}_{\text{all}}}$$

The age-specific lesbian and bisexual density was computed in a similar way, and we considered bisexual men and women as distinct categories for analyses.

We adjusted for poverty level in our analyses, with poverty level being defined as the percentage of the population living under the Federal poverty level, which has been found to be the most consistent, easily interpretable variable which accurately measures socioeconomic disparities in health outcomes [29, 30].

### Statistical Analysis

Descriptive statistics summarized variation in adult cancer incidence by gender and race. We assessed county-level association between lesbian/gay/bisexual density (LGBD) and cancer incidence rates using multivariable Poisson regression models with the age-race-stratified count of incident cases in each county as the dependent variable, and the LGBD, race, age group and US Census percent in poverty as covariates. Because the correlation between lesbian/gay density and bisexual density was low—0.36 ( $p < 0.0001$ ) for women and 0.15 ( $p < 0.0001$ ) for men—we fitted models that considered L/G and B together. The model selection was based on the goodness-of-fit of the models assessed by the Akaike Information Criterion (AIC) and residual diagnostics plots. SAS PROC GENMOD was used to fit the models, with the offset term as the logarithm of the US Census age-race-stratified total adult population in the county. The incidence rate ratio (IRR) was presented as the measure of the effect of each predictor, along with its 95% confidence interval and p-value. The validity of the assumptions and the goodness-

1  
2  
3 of-fit of the assumed models were assessed by residual diagnostic plots and goodness-of-fit  
4  
5 statistics such as the Deviance statistic. All analyses were done in SAS 9.2 (SAS Institute Inc,  
6  
7 Cary NC, USA).  
8  
9

10 Regression diagnostics indicated that the Los Angeles County, white male, age 70-84,  
11  
12 data point was a potentially influential point. We refit all regression models excluding this data  
13  
14 point.  
15  
16

## 17 18 19 **RESULTS**

20 We describe age-adjusted regression results for measures of sexual minority density,  
21  
22 race/ethnicity, and poverty as predictors of cancer incidence.  
23  
24  
25

### 26 27 **Sexual orientation, demographics, and cancer incidence among males**

28 Controlling for race/ethnicity and poverty, gay density was not associated with county-  
29  
30 level lung cancer incidence among males (Table 1), although bisexual density was associated  
31  
32 with an 8.4 percent decrease in lung cancer incidence (IRR=0.916,  $p<0.0001$ ). There were  
33  
34 expected significant associations between self-reported race/ethnic category and incidence, and a  
35  
36 positive association between poverty and lung cancer incidence was weaker but still statistically  
37  
38 significant. After excluding the Los Angeles County outlier from the regression model for male  
39  
40 lung cancer, the associations were unchanged in strength and significance between gay/ bisexual  
41  
42 density and lung cancer.  
43  
44  
45  
46  
47

48 Controlling for race/ethnicity and poverty, gay density was not significantly associated  
49  
50 with colorectal cancer incidence (Table 2), but bisexual density among males was associated  
51  
52 with a 2.7% increase in incidence of colorectal cancer (IRR=1.027,  $p=0.02$ ).  
53  
54  
55  
56  
57  
58  
59  
60

### Sexual orientation, demographics, and cancer incidence among females

Controlling for race/ethnicity and poverty, each one-percentage-point increase in lesbian density was associated with a 5.1% decrease in incidence of lung cancer (IRR=0.949,  $p<0.0001$ ; Table 3), whereas each one-unit increase in bisexual density was associated with an 11.3% increase (IRR=1.113,  $p<0.0001$ ). There were significant negative association between female lung cancer incidence and Hispanic, Asian/Pacific Islander and Other race. There was no significant association between female lung cancer incidence and poverty.

Controlling for race/ethnicity and poverty, each one-unit increase in lesbian density was associated with a 2.9% decrease in the incidence of colorectal cancer among women (IRR=0.971,  $p=0.0095$ ; Table 4); bisexual density was not associated with incidence of colorectal cancer among women. Hispanic ethnicity had a significant negative association, Asian/Pacific Islander and Other race had a significant positive association with incidence of colorectal cancer among women. Poverty was not significantly associated with incidence of colorectal cancer in females.

Controlling for race/ethnicity and poverty, each one-unit increase in lesbian density was significantly associated with a 2.3% increase, and bisexual density with a 3.2% decrease, in incidence of female breast cancer (lesbian: IRR=1.023,  $p<0.0001$ ; bisexual: IRR=0.968,  $p<0.0001$ ; Table 5). Hispanic, Asian/Pacific Islander, and Other race/ethnicity had significant negative associations with breast cancer incidence. Poverty was modestly but significantly associated with decreased breast cancer incidence.

Excluding Los Angeles County from the regression model resulted in little change to the results for female breast cancer, female lung cancer, and female colorectal cancer.

## DISCUSSION

This study's findings document disparities in the age-adjusted incidence of three cancers across the counties of California: disparities that are associated with the density of sexual minorities, controlling for race/ethnicity and the prevalence of poverty. Our outcome measure provides effect estimates in the form of the percentage change in cancer incidence per one unit increase in sexual minority density, and thus an IRR that is only modestly different from 1.0 may represent a substantial difference in real-world terms, given the variation in gay and lesbian densities across counties.

Among males, bisexual density (but not gay density) was significantly associated with cancer incidence. Specifically, bisexual density was associated with lower incidence of lung cancer and, less strongly, with higher incidence of colorectal cancer. Among females, both lesbian and bisexual density were significantly associated with cancer incidence. However, across all three cancers, these two associations were opposite in direction: lesbian density was associated with lower incidence of lung and colorectal cancer, and with higher incidence of breast cancer; bisexual density was associated with higher incidence of lung and colorectal cancer, and with lower incidence of breast cancer. The strongest associations between sexual orientation and cancer incidence, and thus the greatest gap between findings by sexual orientation, were for lung cancer: lesbian density is associated with a 5.1% decrease, and bisexual density with an 11.3% increase, in lung cancer incidence per one-unit increase in sexual minority density.

These differences between results for lesbian/gay density and bisexual density are consistent with an increasing understanding among sexual orientation researchers that—after years of combining lesbian/gay and bisexual individuals into one group due to small sample

1  
2  
3 sizes—differences between these groups come to the forefront once they are separated [8, 31-  
4  
5 34]. These findings reflect methodological improvements on our previous studies of sexual  
6  
7 minority density and cancer incidence [21-23]: those analyses used U.S. Census data on whether  
8  
9 a respondent lived in a same-sex partnered household, whereas data for the current analysis rest  
10  
11 on self-reported sexual identity from the California Health Interview Survey, as described above,  
12  
13 and distinguish between gay/lesbian and bisexual respondents. A comparison of findings from  
14  
15 our other analyses to those of this study shows a mix of consistencies and inconsistencies, partly  
16  
17 attributable to this improvement in the ascertainment of sexual minority orientation, the ability to  
18  
19 distinguish lesbian/gay density from bisexual density.  
20  
21  
22  
23

24  
25 Using SEER data, colorectal cancer incidence was significantly and positively associated  
26  
27 with both sexual minority men density and sexual minority women density [22]; that finding  
28  
29 aligns with this study's finding for male and female bisexual density and colorectal cancer, but is  
30  
31 inconsistent with the present findings for gay and lesbian density. In the present study, we  
32  
33 identified among males no association between gay density and lung cancer, and a negative  
34  
35 association between bisexual density and lung cancer; this conflicts with our finding of a positive  
36  
37 association between bisexual density and lung cancer; this conflicts with our finding of a positive  
38  
39 association for sexual minority men density and lung cancer using a different dataset [23]. For  
40  
41 female lung cancer, our current findings for lesbian women are consistent with our previous  
42  
43 finding of a significant negative association between lung cancer and sexual minority women  
44  
45 density [23], although the present study also found a positive association with bisexual density  
46  
47 specifically. Finally, findings for breast cancer show some consistency: in the present study,  
48  
49 lesbian density has a significant positive association with breast cancer incidence, confirming our  
50  
51 earlier findings [21], although the present study also identified a negative association with  
52  
53 bisexual density.  
54  
55  
56  
57  
58  
59  
60

1  
2  
3 A number of factors are likely to contribute to differences between results of earlier  
4  
5  
6  
7  
8  
9  
10  
11  
12  
13  
14  
15  
16  
17  
18  
19  
20  
21  
22  
23  
24  
25  
26  
27  
28  
29  
30  
31  
32  
33  
34  
35  
36  
37  
38  
39  
40  
41  
42  
43  
44  
45  
46  
47  
48  
49  
50  
51  
52  
53  
54  
55  
56  
57  
58  
59  
60

A number of factors are likely to contribute to differences between results of earlier Census-based analyses, which did not distinguish between gays/lesbians and bisexuals, and those of the present study, which relied on self-reported sexual identity. The Census data on same-sex partnered households are probably better indicators of gay and lesbian than bisexual individuals, given data showing that the majority of partnered gay and lesbian individuals have a same-sex partner, whereas partnered bisexual individuals are more likely to be in heterosexual relationships [34]. Another factor may be the relative size of the subgroups within the LGB adult population: among women, more identify as bisexual than lesbian, whereas among men, more identify as gay [35]. The present study is limited to cancer incidence in California, while the previous SEER-based study was representative of the United States. Given the difference in geographic scope, the earlier studies used a roughly fourfold larger sample (215 counties compared to the present study's 58 counties); thus in the current study we had lower statistical power to detect associations. Both ecological studies failed to achieve a complete ascertainment of sexual minority status, albeit for different reasons; the Census-based studies relied on an enumeration of same-sex partnered individuals, while the present study relied on population estimates of sexual identity. Methodological differences aside, there may be real-world differences between California and the country as a whole in connections between sexual minority density and cancer incidence.

This study has the inherent limitations of the ecologic study design. In particular, because data are at the county level, it is not possible to link sexual minority status to cancer risk at the level of the individual. Thus, our study findings clearly describe links between county-level density measures and cancer incidence and should not be interpreted as evidence of an association between individual sexual orientation and cancer incidence. A finer scale—for

1  
2  
3 example, at the level of the census tract—may provide more insight into patterns of sexual  
4  
5 minority density and cancer incidence, but it is not yet clear what is the most appropriate  
6  
7 geographic scale for such studies.  
8  
9

10  
11 At present, there is essentially no systematic surveillance of sexual minorities, other than  
12  
13 simply reporting differences in the prevalence of health risk factors. The work described here  
14  
15 and in our previous analyses [21-23] pinpoints the existence of public health disparities in cancer  
16  
17 incidence at the county level. Future studies are needed to identify ecological causes for the  
18  
19 disparity in cancer incidence, which are likely complex, possibly examining county-level factors  
20  
21 related to sexual minorities' access to the health care system and quality of care delivery.  
22  
23 Nevertheless, the consistency with which our ecological analyses identified disparities in cancer  
24  
25 incidence, are an opportunity for public health policy interventions, which are larger in scale,  
26  
27 considering county-level programs, rather than interventions that focus on individual behavior  
28  
29 change.  
30  
31  
32  
33  
34  
35

36 **Acknowledgments:** This work was supported by the National Cancer Institute at the National  
37  
38 Institutes of Health (grant number 1 R03 CA153063-01).  
39

40  
41 **Conflict of interests:** None declared  
42

43  
44 **Data sharing agreement:** There is no additional data available.  
45

46  
47 **Contributor Statement:** U Boehmer originated the study and interpreted the findings. X Miao  
48  
49 conducted the analyses and helped to interpret the findings. N Maxwell led the writing. A  
50  
51 Ozonoff used his statistical expertise to direct the analysis and helped to interpret the findings.  
52  
53 All authors contributed in significant ways to the final article by discussing earlier drafts,  
54  
55 reviewing, and revising the manuscript.  
56  
57  
58  
59  
60

1  
2  
3  
4  
5  
6  
7  
8  
9  
10  
11  
12  
13  
14  
15  
16  
17  
18  
19  
20  
21  
22  
23  
24  
25  
26  
27  
28  
29  
30  
31  
32  
33  
34  
35  
36  
37  
38  
39  
40  
41  
42  
43  
44  
45  
46  
47  
48  
49  
50  
51  
52  
53  
54  
55  
56  
57  
58  
59  
60

For peer review only



## References

- 1 U.S. Cancer Statistics Working Group. United States Cancer Statistics: 1999–2008 Incidence and Mortality Web-based Report. . Atlanta, GA: Department of Health and Human Services, Centers for Disease Control and Prevention, and National Cancer Institute 2012.
- 2 IARC Working Group on the Evaluation of Cancer Preventive Strategies. *Weight Control and Physical Activity*. Lyon, France: IARC Press 2001.
- 3 Ryan H, Wortley PM, Easton A, *et al*. Smoking among lesbians, gays, and bisexuals: a review of the literature. *Am J Prev Med* 2001;**21**:142-9.
- 4 Tang H, Greenwood GL, Cowling DW, *et al*. Cigarette smoking among lesbians, gays, and bisexuals: how serious a problem? (United States). *Cancer Causes Control* 2004;**15**:797-803.
- 5 Burgard SA, Cochran SD, Mays VM. Alcohol and tobacco use patterns among heterosexually and homosexually experienced California women. *Drug Alcohol Depend* 2005;**77**:61-70.
- 6 The President's Cancer Panel. Promoting Healthy Lifestyles: Policy, Program, and Personal Recommendations for Reducing Cancer Risk. Annual Report 2006-2007. In: Panel TPsC, ed. Bethesda, MD: U.S. Department of Health and Human Services, 2007.
- 7 Lee JG, Griffin GK, Melvin CL. Tobacco use among sexual minorities in the USA, 1987 to May 2007: a systematic review. *Tob Control* 2009;**18**:275-82.
- 8 Boehmer U, Miao X, Linkletter C, *et al*. Adult health behaviors in different age cohorts by sexual orientation. *Am J Public Health* 2012;**102**:292-300.

- 1  
2  
3 9 Cochran SD, Keenan C, Schober C, *et al.* Estimates of alcohol use and clinical treatment  
4 needs among homosexually active men and women in the U.S. population. *J Consult Clin*  
5  
6  
7  
8 *Psychol* 2000;**68**:1062-71.  
9
- 10 10 Cochran SD, Mays VM, Bowen D, *et al.* Cancer-related risk indicators and preventive  
11 screening behaviors among lesbians and bisexual women. *Am J Public Health* 2001;**91**:591-7.  
12  
13  
14
- 15 11 Gilman SE, Cochran SD, Mays VM, *et al.* Risk of psychiatric disorders among  
16 individuals reporting same-sex sexual partners in the National Comorbidity Survey. *Am J Public*  
17  
18  
19  
20  
21 *Health* 2001;**91**:933-9.
- 22 12 Drabble L, Midanik LT, Trocki K. Reports of alcohol consumption and alcohol-related  
23 problems among homosexual, bisexual and heterosexual respondents: results from the 2000  
24  
25  
26  
27  
28  
29  
30  
31  
32  
33  
34  
35  
36  
37  
38  
39  
40  
41  
42  
43  
44  
45  
46  
47  
48  
49  
50  
51  
52  
53  
54  
55  
56  
57  
58  
59  
60
- 13 13 Valanis BG, Bowen DJ, Bassford T, *et al.* Sexual orientation and health: Comparisons in  
the women's health initiative sample. *Arch Fam Med* 2000;**9**:843-53.
- 14 14 Case P, Bryn Austin S, Hunter DJ, *et al.* Sexual Orientation, Health Risk Factors, and  
Physical Functioning in the Nurses' Health Study II. *J Womens Health* 2004;**13**:1033-47.
- 15 15 Boehmer U, Bowen DJ. Examining factors linked to overweight and obesity in women of  
different sexual orientations. *Prev Med* 2009;**48**:357-61.
- 16 16 Boehmer U, Bowen DJ, Bauer GR. Overweight and obesity in sexual minority women:  
evidence from population-based data. *Am J Public Health* 2007;**97**:1134-40.
- 17 17 Deputy NP, Boehmer U. Determinants of body weight among men of different sexual  
orientation. *Prev Med* 2010;**51**:129-31.
- 18 18 Rankow EJ, Tessaro I. Mammography and Risk Factors for Breast Cancer in Lesbian and  
Bisexual Women. *American Journal of Health Behavior* 1998;**22**:403-10.

- 1  
2  
3  
4 19 Kavanaugh-Lynch MHE, White E, Daling JR, *et al.* Correlates of lesbian sexual  
5 orientation and the risk of breast cancer. *J Gay Lesbian Med Assoc* 2002;**6**:91-5.  
6  
7  
8 20 Dibble SL, Roberts SA, Nussey B. Comparing breast cancer risk between lesbians and  
9 their heterosexual sisters. *Womens Health Issues* 2004;**14**:60-8.  
10  
11  
12 21 Boehmer U, Ozonoff A, Timm A. County-level association of sexual minority density  
13 with breast cancer incidence: results from an ecological study. *Sex Res Social Policy* 2011;**8**:139-  
14 45.  
15  
16  
17 22 Boehmer U, Ozonoff A, Miao X. An ecological analysis of colorectal cancer incidence  
18 and mortality: Differences by sexual orientation. *BMC Cancer* 2011;**11**:400.  
19  
20  
21 23 Boehmer U, Ozonoff A, Miao X. An ecological approach to examine lung cancer  
22 disparities due to sexual orientation. *Public Health* 2012;**126**:605-12.  
23  
24  
25 24 Steele LS, Ross LE, Dobinson C, *et al.* Women's sexual orientation and health: results  
26 from a Canadian population-based survey. *Women Health* 2009;**49**:353-67.  
27  
28  
29 25 Brewster KL, Tillman KH. Sexual Orientation and Substance Use Among Adolescents  
30 and Young Adults. *Am J Public Health* 2012;**102**:1168-76.  
31  
32  
33 26 Tjepkema M. Health care use among gay, lesbian and bisexual Canadians. *Health Rep*  
34 2008;**19**:53-64.  
35  
36  
37 27 Kertzner RM, Meyer IH, Frost DM, *et al.* Social and psychological well-being in  
38 lesbians, gay men, and bisexuals: the effects of race, gender, age, and sexual identity. *Am J*  
39 *Orthopsychiatry* 2009;**79**:500-10.  
40  
41  
42 28 Lee S, Brown ER, Grant D, *et al.* Exploring Nonresponse Bias in a Health Survey Using  
43 Neighborhood Characteristics. *Am J Public Health* 2009;**99**:1811-7.  
44  
45  
46  
47  
48  
49  
50  
51  
52  
53  
54  
55  
56  
57  
58  
59  
60

- 1  
2  
3 29 Singh G, Miller B, Hankey B, *et al.* Area Socioeconomic Variations in U.S. Cancer  
4 Incidence, Mortality, Stage, Treatment, and Survival, 1975–1999. *NCI Cancer Surveillance*  
5  
6 *Monograph Series*. Bethesda, MD: National Cancer Institute 2003.  
7  
8  
9  
10 30 Krieger N, Chen JT, Waterman PD, *et al.* Painting a truer picture of US socioeconomic  
11 and racial/ethnic health inequalities: the Public Health Disparities Geocoding Project. *Am J*  
12 *Public Health* 2005;**95**:312-23.  
13  
14  
15  
16  
17 31 Institute of Medicine. *The Health of Lesbian, Gay, Bisexual, and Transgender People:*  
18 *Building a Foundation for Better Understanding*. Washington, DC: The National Academies  
19 Press. 2011.  
20  
21  
22  
23  
24 32 Bauer GR, Jaram JA. Are lesbians really women who have sex with women (WSW)?  
25 Methodological concerns in measuring sexual orientation in health research. *Women Health*  
26 2008;**48**:383-408.  
27  
28  
29  
30  
31 33 Fredriksen-Goldsen KI, Kim H-J, Barkan SE, *et al.* Disparities in Health-Related Quality  
32 of Life: A Comparison of Lesbians and Bisexual Women. *Am J Public Health* 2010;**100**:2255-  
33 61.  
34  
35  
36  
37  
38 34 Herek G, Norton A, Allen T, *et al.* Demographic, Psychological, and Social  
39 Characteristics of Self-Identified Lesbian, Gay, and Bisexual Adults in a US Probability Sample.  
40 *Sex Res Social Policy* 2010;**7**:176-200.  
41  
42  
43  
44  
45 35 Greenberg JA. Health Care Issues Affecting People with an Intersex Condition or DSD:  
46 Sex or Disability Discrimination? *Loyola of Los Angeles Law Review* 2012;**45**:849.  
47  
48  
49  
50  
51  
52  
53  
54  
55  
56  
57  
58  
59  
60

**Table 1** *Multivariate Poisson Regression Analysis for Male Lung Cancer†*

| Predictors                      | Regression coefficient estimate | IRR    | 95% CI of IRR |       | p-value |
|---------------------------------|---------------------------------|--------|---------------|-------|---------|
| Gay density                     | 0.0004                          | 1.0004 | 0.995         | 1.006 | 0.88    |
| Bisexual density                | -0.0875                         | 0.916  | 0.897         | 0.936 | <0.0001 |
| Hispanic vs. non-Hispanic white | -0.4243                         | 0.654  | 0.637         | 0.672 | <0.0001 |
| Asian/PI vs. non-Hispanic white | -0.0674                         | 0.935  | 0.910         | 0.960 | <0.0001 |
| Other vs. non-Hispanic white    | -0.0537                         | 1.055  | 1.025         | 1.086 | 0.0003  |
| Poverty                         | 0.0134                          | 1.014  | 1.012         | 1.015 | <0.0001 |

† results also adjusted for age

**Table 2** *Multivariate Poisson Regression Analysis for Male Colorectal Cancer†*

| Predictors                      | Regression coefficient estimate | IRR   | 95% CI of IRR |       | p-value |
|---------------------------------|---------------------------------|-------|---------------|-------|---------|
| Gay density                     | -0.0020                         | 0.998 | 0.993         | 1.003 | 0.45    |
| Bisexual density                | 0.0262                          | 1.027 | 1.004         | 1.050 | 0.02    |
| Hispanic vs. non-Hispanic white | 0.0411                          | 1.042 | 1.018         | 1.067 | 0.0006  |
| Asian/PI vs. non-Hispanic white | 0.1056                          | 1.111 | 1.082         | 1.142 | <0.0001 |
| Other vs. non-Hispanic white    | 0.0942                          | 1.099 | 1.065         | 1.134 | <0.0001 |
| Poverty                         | 0.0038                          | 1.004 | 1.002         | 1.006 | <0.0001 |

† results also adjusted for age

**Table 3** *Multivariate Poisson Regression Analysis for Female Lung Cancer*<sup>†</sup>

| Predictors                      | Regression coefficient estimate | IRR   | 95% CI of IRR |       | p-value |
|---------------------------------|---------------------------------|-------|---------------|-------|---------|
| Lesbian density                 | -0.0521                         | 0.949 | 0.928         | 0.971 | <0.0001 |
| Bisexual density                | 0.1067                          | 1.113 | 1.078         | 1.149 | <0.0001 |
| Hispanic vs. non-Hispanic white | -0.7012                         | 0.496 | 0.482         | 0.511 | <0.0001 |
| Asian/PI vs. non-Hispanic white | -0.5264                         | 0.591 | 0.573         | 0.609 | <0.0001 |
| Other vs. non-Hispanic white    | -0.1527                         | 0.858 | 0.832         | 0.885 | <0.0001 |
| Poverty                         | 0.0013                          | 1.001 | 0.999         | 1.003 | 0.18    |

<sup>†</sup> results also adjusted for age

**Table 4** *Multivariate Poisson Regression Analysis for Female Colorectal Cancer*<sup>†</sup>

| Predictors                      | Regression coefficient estimate | IRR   | 95% CI of IRR |       | p-value |
|---------------------------------|---------------------------------|-------|---------------|-------|---------|
| Lesbian density                 | -0.0290                         | 0.971 | 0.950         | 0.993 | 0.0095  |
| Bisexual density                | 0.0268                          | 1.027 | 0.994         | 1.062 | 0.11    |
| Hispanic vs. non-Hispanic white | -0.0670                         | 0.932 | 0.909         | 0.957 | <0.0001 |
| Asian/PI vs. non-Hispanic white | 0.1133                          | 1.120 | 1.090         | 1.151 | <0.0001 |
| Other vs. non-Hispanic white    | 0.1616                          | 1.175 | 1.139         | 1.213 | <0.0001 |
| Poverty                         | 0.0020                          | 1.002 | 1.000         | 1.004 | 0.056   |

<sup>†</sup> results also adjusted for age



**Table 5** *Multivariate Poisson Regression Analysis for Female Breast Cancer*<sup>†</sup>

| Predictors                      | Regression coefficient estimate | IRR   | 95% CI of IRR |       | p-value |
|---------------------------------|---------------------------------|-------|---------------|-------|---------|
| Lesbian density                 | 0.0225                          | 1.023 | 1.014         | 1.031 | <0.0001 |
| Bisexual density                | -0.0328                         | 0.968 | 0.955         | 0.981 | <0.0001 |
| Hispanic vs. non-Hispanic white | -0.2691                         | 0.764 | 0.755         | 0.774 | <0.0001 |
| Asian/PI vs. non-Hispanic white | -0.1790                         | 0.836 | 0.824         | 0.848 | <0.0001 |
| Other vs. non-Hispanic white    | -0.2533                         | 0.776 | 0.763         | 0.790 | <0.0001 |
| Poverty                         | -0.0106                         | 0.990 | 0.989         | 0.991 | <0.0001 |

<sup>†</sup> results also adjusted for age



**Sexual Minority Population Density and Incidence of Lung,  
Colorectal, and Female Breast Cancer in California**

|                                 |                                                                                                                                                                                                                                                                                                                                                                                                |
|---------------------------------|------------------------------------------------------------------------------------------------------------------------------------------------------------------------------------------------------------------------------------------------------------------------------------------------------------------------------------------------------------------------------------------------|
| Journal:                        | <i>BMJ Open</i>                                                                                                                                                                                                                                                                                                                                                                                |
| Manuscript ID:                  | bmjopen-2013-004461.R1                                                                                                                                                                                                                                                                                                                                                                         |
| Article Type:                   | Research                                                                                                                                                                                                                                                                                                                                                                                       |
| Date Submitted by the Author:   | 07-Feb-2014                                                                                                                                                                                                                                                                                                                                                                                    |
| Complete List of Authors:       | Boehmer, Ulrike; Boston University School of Public Health, Department of Community Health Sciences<br>Miao, Xiaopeng; Boston University School of Public Health, Department of Biostatistics<br>Maxwell, Nancy; Boston University School of Public Health, Department of Community Health Sciences<br>Ozonoff, Al; Boston Children's Hospital, Center for Patient Safety and Quality Research |
| <b>Primary Subject Heading</b>: | Oncology                                                                                                                                                                                                                                                                                                                                                                                       |
| Secondary Subject Heading:      | Oncology, Public health                                                                                                                                                                                                                                                                                                                                                                        |
| Keywords:                       | Adult oncology < ONCOLOGY, Breast tumours < ONCOLOGY, Epidemiology < ONCOLOGY                                                                                                                                                                                                                                                                                                                  |
|                                 |                                                                                                                                                                                                                                                                                                                                                                                                |

SCHOLARONE™  
Manuscripts

**Research Article****Sexual Minority Population Density and Incidence of Lung, Colorectal, and Female Breast Cancer in California**

Running title: Sexual Minority Density and Incidence

Ulrike Boehmer<sup>1\*</sup>, Xiaopeng Miao<sup>2</sup>, Nancy I Maxwell<sup>1</sup>, Al Ozonoff<sup>3</sup>

<sup>1</sup> Department of Community Health Sciences, Boston University School of Public Health, Boston, MA 02118 USA

<sup>2</sup> Department of Biostatistics, Boston University School of Public Health, Boston, MA 02118 USA

<sup>3</sup> Center for Patient Safety and Quality Research, Boston Children's Hospital, 300 Longwood Avenue, Boston, MA 02115, USA

\* Corresponding Author

Ulrike Boehmer, Ph.D.

Department of Community Health Sciences

Boston University School of Public Health

801 Massachusetts Avenue, Crosstown Center

Boston, MA 02118

USA

Phone 617-638-5835

Fax 617-638-4483

Email [boehmer@bu.edu](mailto:boehmer@bu.edu)

**ABSTRACT**

Objective: Risk factors for breast, colorectal, and lung cancer are known to be more common among lesbian, gay, and bisexual (LGB) individuals, suggesting they may more likely develop these cancers. Our objective was to determine differences in cancer incidence by sexual orientation, using sexual orientation data aggregated at the county-level.

Methods: Data on cancer incidence were obtained from the California Cancer Registry and data on sexual orientation were obtained from the California Health Interview Survey, from which a measure of age-specific LGB population density by county was calculated. Using multivariable Poisson regression models the association between the age-race-stratified incident rate of breast, lung, and colorectal cancer in each county and LGB population density was examined, with race, age group, and poverty as covariates.

Results: Among males, bisexual population density was associated with lower incidence of lung cancer and with higher incidence of colorectal cancer. Among females, lesbian population density was associated with lower incidence of lung and colorectal cancer, and with higher incidence of breast cancer; bisexual population density was associated with higher incidence of lung and colorectal cancer, and with lower incidence of breast cancer.

Conclusions: These study findings clearly document links between county-level LGB population density and cancer incidence, illuminating an important public health disparity.

Keywords: Homosexuality, cancer incidence, breast cancer, colorectal cancer, lung cancer, disparities, sex differences

## ARTICLE SUMMARY

### Strengths and limitations of this study

- Using sexual orientation population data aggregated at the county-level findings identify associations between cancer incidence and sexual minority population density.
- These county-level differences in cancer incidence suggest a need for public health planning, previously unavailable.
- Because cancer registries do not document sexual orientation, determining whether disparities exist in cancer incidence due to sexual orientation is not possible otherwise.
- Because data are at the county level, it is not possible to link sexual minority status to cancer risk at the level of the individual.
- Study findings have the inherent limitations of the ecologic study design.

## INTRODUCTION

Lung, colorectal, and female breast cancer are three of the most commonly diagnosed cancers in the United States, with incidence rates of 79.5, 51.6, and 121.9 per 100,000, respectively, in 2008. [1] Smoking and alcohol use are well-known risk factors for all three of these cancers; overweight and/or obesity has been linked to risk of female breast cancer and colorectal cancer. [2] In addition, nulliparity is associated with increased risk of female breast cancer.

Research also indicates that the prevalence of these well-known risk factors is generally higher among sexual minority individuals—that is, lesbian, gay, and bisexual individuals. Smoking is more common among sexual minorities, both men and women, than among their heterosexual counterparts.[3-8] Further, in 2007 the President’s Cancer Panel found that sexual minority youths smoke at rates as high as those of adults, and tend to start smoking at a younger age than heterosexual youths.[6] Sexual minority women are more likely than heterosexual women to drink alcohol [5, 8-12] and to be overweight or obese.[10, 13-16] In contrast, gay men’s alcohol use has not been shown to differ from that of heterosexual men,[12] and gay men are less likely than heterosexual men to be overweight or obese. [17] Finally, sexual minority women have higher rates of nulliparity than heterosexual women. [10, 13, 14, 18-20]

Because cancer registries do not collect information on the sexual orientation of individuals diagnosed with cancer, it cannot be readily determined from SEER or state registry data whether cancer is more prevalent among individuals with a sexual minority orientation. To overcome this lack of data on cancer disparities by sexual orientation, three previous studies used county-level ecologic analyses to relate breast, lung, and colorectal cancer incidence to greater sexual minority population density [21-23]. Previously, we used SEER registry data and US

1  
2  
3 Census data on individuals living in same-sex partnered households as a proxy measure for  
4 sexual minority orientation. These ecological studies concluded that greater female sexual  
5 minority density (SMD) in a county is associated with greater incidence of breast and colorectal  
6 cancer [21, 22], while there was a negative relationship between female sexual minority  
7 population density and lung cancer incidence [23]. Greater density of sexual minority men was  
8 associated with higher incidence of lung and colorectal cancer [22, 23].  
9  
10  
11  
12  
13  
14  
15  
16

17 While US census data on same-sex households are a well-established proxy for sexual  
18 orientation, these data also have known limitations. From available Census data, we can  
19 enumerate households led by same-sex adults, but this surely represents an undercount since we  
20 capture only sexual minority individuals who live with a same-sex partner, thereby excluding  
21 sexual minority individuals who are living alone or with non-partners. Further, we do not know  
22 how many members of a same-sex partnered household identify as lesbian, gay, or bisexual. In  
23 particular, it is impossible to assess lesbians separately from bisexual women or to assess gay  
24 men separately from bisexual men. This is an important limitation, because studies that analyzed  
25 lesbian women separately from bisexual women concluded bisexuals fare worse on some health  
26 indicators than both heterosexual and lesbian women [24-27].  
27  
28  
29  
30  
31  
32  
33  
34  
35  
36  
37  
38  
39  
40

41 To address the limitations of US Census data, the present study traded a national scope  
42 for an improved measure of sexual minority density. We used statewide population-based data  
43 on sexual minority identity (gay, lesbian, or bisexual) to estimate its relationship to colorectal  
44 cancer, lung cancer, and female breast cancer incidence.  
45  
46  
47  
48  
49  
50

## 51 **MATERIALS AND METHODS**

52  
53

54 The Institutional Review Board deemed this study exempt from protocol review. Data for  
55 this research project were taken from the California Health Interview Survey (CHIS), the largest  
56  
57  
58  
59  
60

1  
2  
3 state health survey conducted in the US. The CHIS employs a two-stage geographically stratified  
4  
5 random-digit-dial (RDD) sample of households, surveying one randomly selected adult from  
6  
7 each sampled household. The survey is administered in multiple languages, resulting in a large  
8  
9 multiethnic/multiracial sample that accurately represents the California population living in  
10  
11 households. The CHIS response rate shows no significant nonresponse bias by demographic  
12  
13 characteristics such as age, sex, income, education, or employment status [28]; however, due to  
14  
15 the absence of a sampling frame, nonresponse by sexual orientation has not been evaluated.  
16  
17  
18 More detailed information about the survey methodology can be obtained from the website:  
19  
20 <http://www.chis.ucla.edu/>. The CHIS collects information biennially, including data on sexual  
21  
22 orientation. To ascertain sexual orientation, respondents were asked about their sexual identity,  
23  
24 with response choices of heterosexual, lesbian, gay, or bisexual along with celibate or other,  
25  
26 while recording refusals and don't know responses. We combined four years of data, using the  
27  
28 adult CHIS surveys from 2001, 2003, 2005, and 2007 to increase the numbers of individuals who  
29  
30 report a sexual minority orientation, defined as gay, lesbian, or bisexual.  
31  
32  
33  
34  
35

36  
37 Data on cancer incidence were taken from the California Cancer Registry, which records  
38  
39 all cancer cases to monitor the occurrence of cancer among Californians. We chose the cancer  
40  
41 data for the years 2001-2008 because these years cover the same timeframe as the CHIS sexual  
42  
43 minority data. We further restricted our data to men and women aged 18 to 84, because we  
44  
45 focused on adult cancers and also because this is the age range for which the CHIS had sexual  
46  
47 orientation data available.  
48  
49

50  
51 Because there are differences in cancer incidence by age and race, we used the population  
52  
53 data from Census 2000 since it has age- and race- specific population data available for all the 58  
54  
55  
56  
57  
58  
59  
60



1  
2  
3 counties in California. From the Census, we also obtained county-level data on poverty, another  
4  
5 important confounder of cancer incidence.  
6  
7

## 8 9 **Measures**

10  
11 Counts of breast, lung, and colorectal cancer incidence were classified into one of 11 age  
12  
13 categories and four race/ethnicity groups. The 11 age categories were 18-24, 25-29, 30-34, 35-  
14  
15 39, 40-44, 45-49, 50-54, 55-59, 60-64, 65-69 and 70-84, while race and ethnicity consisted of (1)  
16  
17 Non-Hispanic White, (2) Hispanic, (3) Asian/Pacific Islander, and (4) other race/ethnicity. The  
18  
19 group of other race/ethnicity combines non-Hispanic Blacks (6.79% of cancers), other/unknown  
20  
21 race/ethnicity (0.73% of cancers) and non-Hispanic American-Indian (0.14 % of cancers). We  
22  
23 calculated each cancer incidence rate using the total female and male population between age 18  
24  
25 and 84 in each county using the Census data.  
26  
27  
28  
29

30  
31 We adjusted for poverty level in our analyses, with poverty level being defined as the  
32  
33 percentage of the population living under the Federal poverty level, which has been found to be  
34  
35 the most consistent, easily interpretable variable which accurately measures socioeconomic  
36  
37 disparities in health outcomes [29, 30].  
38  
39

40  
41 Our main independent variable is derived from CHIS data on participants' sexual  
42  
43 orientation. We are using these data aggregated at the county-level and call this aggregate  
44  
45 variable 'sexual minority density' (SMD) to express variation in the density of sexual minority  
46  
47 populations in a county. To make these data age-specific, we obtained the distribution of sexual  
48  
49 minorities, defined as lesbians, gays, or bisexuals, across different age groups, and combined this  
50  
51 information with the county-level SMD. Specifically, we obtained the weighted percentage of  
52  
53 gay men in a specific age group (denoted as `ageweight_gay`), using the age information on all  
54  
55 gay men in the 58 California counties. Then, we obtained the weighted percentage of all men in  
56  
57  
58  
59  
60

1  
2  
3 the specific age group (denoted as `ageweight_all`), using the age information on all subjects in  
4  
5 the 58 California counties. Finally, we obtained the count of all adult gay men (`Ngay`) and the  
6  
7 count of all adult men (`Nall`) in the specific age group, and computed the age-specific gay  
8  
9 density as:

$$\text{Age-specific gay density} = \frac{N_{\text{gay}} * \text{ageweight}_{\text{gay}}}{N_{\text{all}} * \text{ageweight}_{\text{all}}}$$

10  
11  
12  
13  
14  
15  
16 The age-specific lesbian and bisexual population density was computed in a similar way, and we  
17  
18 considered bisexual men and women as distinct categories for analyses.

19  
20  
21 Regression diagnostics indicated that the Los Angeles County, white race, age 70-84,  
22  
23 data point was a potentially influential point. We refit all regression models excluding this data  
24  
25 point to ensure that our findings are not predominantly dependent on a single observation. Model  
26  
27 fit did not improve substantially with the exclusion, and more importantly, changes in estimates  
28  
29 of associations between the density measures and cancer incidence were small and well within  
30  
31 the standard errors. Therefore, we report all regression results with no data exclusions.

### 32 33 34 35 36 **Statistical Analysis**

37  
38 We used descriptive statistics to summarize our outcomes, cancer incidence, and our  
39  
40 main independent variables, that is, lesbian, gay, or bisexual population density, for all 58  
41  
42 California counties. We assessed county-level association between lesbian/gay/bisexual density  
43  
44 (LGBD) and cancer incidence rates using multivariable Poisson regression models with the age-  
45  
46 race-stratified count of incident cases in each county as the dependent variable, and the LGBD,  
47  
48 race, age group and US Census percent in poverty as covariates. We fitted models that  
49  
50 considered L/G and B together because the correlation between lesbian/gay density and bisexual  
51  
52 density was low—0.36 ( $p < 0.0001$ ) for women and 0.15 ( $p < 0.0001$ ) for men and because our  
53  
54  
55  
56  
57  
58  
59  
60

1  
2  
3 primary parameter estimates remained essentially unchanged, when we fitted the two density  
4  
5 measures separately All model selections were based on the goodness-of-fit of the models  
6  
7 assessed by the Akaike Information Criterion (AIC) and residual diagnostics plots. SAS PROC  
8  
9 GENMOD was used to fit the models, with the offset term as the logarithm of the US Census  
10  
11 age-race-stratified total adult population in the county. The incidence rate ratio (IRR) was  
12  
13 presented as the measure of the effect of each predictor, along with its 95% confidence interval  
14  
15 and p-value. The validity of the assumptions and the goodness-of-fit of the assumed models were  
16  
17 assessed by residual diagnostic plots and goodness-of-fit statistics such as the Deviance statistic.  
18  
19 All analyses were done in SAS 9.2 (SAS Institute Inc, Cary NC, USA).  
20  
21  
22  
23  
24  
25  
26  
27

## 28 **RESULTS**

29  
30 There is considerable variation in the sexual minority density measures by county. Across  
31  
32 58 California counties, the lesbian density measure ranges from 0 to 3.05 (Median=0.49;  
33  
34 Mean=0.66; SD=0.78) and the bisexual density measure from 0 to 4.16 (Median=1.24;  
35  
36 Mean=1.16; SD=0.97). Gay and bisexual male density measures respectively range from 0 to  
37  
38 16.02 (Median=0.80; Mean=1.10; SD=2.19) and from 0 to 4.07 (Median=0.44; Mean=0.60;  
39  
40 SD=0.76).  
41  
42  
43  
44  
45  
46  
47

### 48 **Sexual orientation, demographics, and cancer incidence among males**

49  
50 Controlling for race/ethnicity and poverty, gay density was not associated with county-  
51  
52 level lung cancer incidence among males (Table 1), although bisexual density was associated  
53  
54 with an 8.4 percent decrease in lung cancer incidence (IRR=0.916,  $p<0.0001$ ). There were  
55  
56  
57  
58  
59  
60

1  
2  
3 expected significant associations between self-reported race/ethnic category and incidence, and a  
4  
5 positive association between poverty and lung cancer incidence.  
6  
7

8 Controlling for race/ethnicity and poverty, gay density was not significantly associated  
9  
10 with colorectal cancer incidence (Table 2), but bisexual density among males was associated  
11  
12 with a 2.7% increase in incidence of colorectal cancer (IRR=1.027, p=0.02).  
13  
14

### 15 16 **Sexual orientation, demographics, and cancer incidence among females** 17

18 Controlling for race/ethnicity and poverty, each one-unit increase in lesbian density was  
19  
20 associated with a 5.1% decrease in incidence of lung cancer (IRR=0.949, p<0.0001; Table 3),  
21  
22 whereas each one- unit increase in bisexual density was associated with an 11.3% increase  
23  
24 (IRR=1.113, p<0.0001). There were significant negative association between female lung cancer  
25  
26 incidence and Hispanic, Asian/Pacific Islander and Other race. There was no significant  
27  
28 association between female lung cancer incidence and poverty.  
29  
30  
31

32 Controlling for race/ethnicity and poverty, each one- unit increase in lesbian density was  
33  
34 associated with a 2.9% decrease in the incidence of colorectal cancer among women  
35  
36 (IRR=0.971, p=0.0095; Table 4); bisexual density was not associated with incidence of  
37  
38 colorectal cancer among women. Hispanic ethnicity had a significant negative association,  
39  
40 Asian/Pacific Islander and Other race had a significant positive association with incidence of  
41  
42 colorectal cancer among women. Poverty was not significantly associated with incidence of  
43  
44 colorectal cancer in females.  
45  
46  
47  
48

49 Controlling for race/ethnicity and poverty, each one-unit increase in lesbian density was  
50  
51 significantly associated with a 2.3% increase, and bisexual density with a 3.2 % decrease, in  
52  
53 incidence of female breast cancer (lesbian: IRR=1.023, p<0.0001; bisexual: IRR=0.968,  
54  
55 p<0.0001; Table 5). Hispanic, Asian/Pacific Islander, and Other race/ethnicity had significant  
56  
57  
58  
59  
60

1  
2  
3 negative associations with breast cancer incidence. Poverty was modestly but significantly  
4  
5 associated with decreased breast cancer incidence.  
6  
7  
8  
9

## 10 11 **DISCUSSION**

12  
13  
14 This study's findings document disparities in the age-adjusted incidence of three cancers across  
15  
16 the counties of California: disparities that are associated with the density of sexual minorities,  
17  
18 controlling for race/ethnicity and the prevalence of poverty. Our outcome measure provides  
19  
20 effect estimates in the form of the percentage change in cancer incidence per one unit increase in  
21  
22 sexual minority population density.  
23  
24

25  
26 Among males, bisexual density (but not gay density) was significantly associated with  
27  
28 cancer incidence. Specifically, bisexual density was associated with lower incidence of lung  
29  
30 cancer and, less strongly, with higher incidence of colorectal cancer. Among females, lesbian  
31  
32 density (but not bisexual density) was significantly associated with colorectal cancer. Both  
33  
34 lesbian and bisexual density were significantly associated with female breast and lung cancer  
35  
36 incidence. However, these two associations were opposite in direction: lesbian density was  
37  
38 associated with lower incidence of lung and higher incidence of breast cancer; bisexual density  
39  
40 was associated with higher incidence of lung and lower incidence of breast cancer. For each  
41  
42 cancer outcome we studied, Los Angeles county, white race, and age 70-84 emerged as an  
43  
44 influential outlying data point. Because Los Angeles county is also the most populous county in  
45  
46 California, we carefully considered issues around the robustness of our results. We conducted a  
47  
48 sensitivity analysis, which suggests our findings are not overly dependent on this single data  
49  
50 point, lending strength to the overall reliability of our findings.  
51  
52  
53  
54  
55  
56  
57  
58  
59  
60

1  
2  
3 The differences between results for lesbian/gay density and bisexual density are  
4 consistent with an increasing understanding among sexual orientation researchers that—after  
5 years of combining lesbian/gay and bisexual individuals into one group due to small sample  
6 sizes—differences between these groups come to the forefront once they are separated [8, 31-  
7 34]. These findings reflect methodological improvements on our previous studies of sexual  
8 minority density and cancer incidence [21-23]: those analyses used U.S. Census data on whether  
9 a respondent lived in a same-sex partnered household, whereas data for the current analysis rest  
10 on self-reported sexual identity from the California Health Interview Survey, as described above,  
11 and distinguish between gay/lesbian and bisexual respondents. A comparison of findings from  
12 our other analyses to those of this study shows a mix of consistencies and inconsistencies.  
13  
14  
15  
16  
17  
18  
19  
20  
21  
22  
23  
24  
25

26 [insert Figure 1]  
27  
28

29 Using SEER data, colorectal cancer incidence was significantly and positively associated  
30 with both sexual minority men density and sexual minority women density [22]; that finding  
31 aligns with this study's finding for male and female bisexual density and colorectal cancer, but is  
32 inconsistent with the present findings for gay and lesbian density. In the present study, we  
33 identified among males no association between gay density and lung cancer, and a negative  
34 association between bisexual density and lung cancer; this conflicts with our finding of a positive  
35 association for sexual minority men density and lung cancer using a different dataset [23]. For  
36 female lung cancer, our current findings for lesbian women are consistent with our previous  
37 finding of a significant negative association between lung cancer and sexual minority women  
38 density [23], although the present study also found a positive association with bisexual density  
39 specifically. Finally, findings for breast cancer show some consistency: in the present study,  
40 lesbian density has a significant positive association with breast cancer incidence, confirming our  
41  
42  
43  
44  
45  
46  
47  
48  
49  
50  
51  
52  
53  
54  
55  
56  
57  
58  
59  
60

1  
2  
3 earlier findings [21], although the present study also identified a negative association with  
4  
5 bisexual density.  
6  
7

8 A number of factors are likely to contribute to differences between results of earlier  
9  
10 Census-based analyses, which did not distinguish between gays/lesbians and bisexuals, and those  
11  
12 of the present study, which relied on self-reported sexual identity. The Census data on same-sex  
13  
14 partnered households are probably better indicators of gay and lesbian than bisexual individuals,  
15  
16 given data showing that the majority of partnered gay and lesbian individuals have a same-sex  
17  
18 partner, whereas partnered bisexual individuals are more likely to be in heterosexual  
19  
20 relationships [34]. The present study's ability to distinguish lesbian/gay density from bisexual  
21  
22 density, is an improvement in the ascertainment of sexual minority orientation. This likely  
23  
24 accounts for identifying effects that are opposite in direction, as for example lesbian density's  
25  
26 association with a 5.1% decrease and bisexual density's 11.3% increase in lung cancer incidence.  
27  
28 Another factor may be the relative size of the subgroups within the LGB adult population:  
29  
30 among women, more identify as bisexual than lesbian, whereas among men, more identify as gay  
31  
32 [35]. Differences in the findings of this study compared to the earlier studies are also attributable  
33  
34 to the difference in geographic scope. The present study is limited to cancer incidence in  
35  
36 California, while the previous SEER-based study was representative of the United States.  
37  
38 Moreover, the earlier studies used a roughly fourfold larger sample (215 counties compared to  
39  
40 the present study's 58 counties); thus in the current study we had lower statistical power to detect  
41  
42 associations. Both ecological studies failed to achieve a complete ascertainment of sexual  
43  
44 minority status, albeit for different reasons; the Census-based studies relied on an enumeration of  
45  
46 same-sex partnered individuals, while the present study relied on population estimates of sexual  
47  
48 identity. Methodological differences aside, there may be real-world differences between  
49  
50  
51  
52  
53  
54  
55  
56  
57  
58  
59  
60

1  
2  
3 California and the country as a whole in connections between sexual minority density and cancer  
4 incidence.  
5  
6

7  
8 This study has the inherent limitations of the ecologic study design. In particular, because  
9 data are at the county level, it is not possible to link sexual minority status to cancer risk at the  
10 level of the individual. Thus, our study findings clearly describe links between county-level  
11 density measures and cancer incidence and should not be interpreted as evidence of an  
12 association between individual sexual orientation and cancer incidence. A finer scale—for  
13 example, at the level of the census tract—may provide more insight into patterns of sexual  
14 minority density and cancer incidence, but it is not yet clear what is the most appropriate  
15 geographic scale for such studies.  
16  
17  
18  
19  
20  
21  
22  
23  
24  
25

26  
27 Despite these limitations, and some inconsistencies between the work described here and  
28 in our previous analyses [21-23], a particular strength is that these ecological analyses identified  
29 the existence of sexual orientation disparities in cancer incidence at the county level, while the  
30 consideration of gender minority density was outside of the scope of this study. Future studies  
31 are needed to identify ecological causes for the disparity in cancer incidence, which are likely  
32 complex, possibly examining county-level factors related to sexual minorities' access to the  
33 health care system and quality of care delivery. So far, a contextual understanding of sexual  
34 minorities' cancer incidence is lacking as well as knowledge about county or neighborhood  
35 effects on sexual minority populations' health and health behaviors more broadly. We suggest  
36 the consistency with which our ecological analyses identified disparities in cancer incidence, is  
37 an opportunity for public health policy interventions, which are larger in scale, considering  
38 county-level programs, rather than interventions that focus on individual behavior change. We  
39 hope additional research can be performed to identify county-level factors, such as density of  
40  
41  
42  
43  
44  
45  
46  
47  
48  
49  
50  
51  
52  
53  
54  
55  
56  
57  
58  
59  
60



1  
2  
3 health care, the equality of health care for sexual minorities, along with other known cancer  
4 prevention behaviors, such as smoking, that may affect cancer incidence.  
5  
6

7  
8 While there is an increasing attention to the collection of sexual orientation data in the  
9 context of state or federal health surveys, from which one can derive differences in the  
10 prevalence of health risk factors, at present, there is no systematic surveillance of sexual or  
11 gender minorities with respect to cancer. Because of this omission, our goal has been to examine  
12 the question about cancer disparities by sexual orientation using ecological analyses. Similarly,  
13 motivated by a lack of individual-level data on sexual orientation and cancer, a recent study  
14 analyzed data on women in same sex and opposite sex relationships, i.e., a proxy for sexual  
15 orientation, concluding that women in same-sex relationships have greater risk for breast cancer  
16 related mortality [36]. So far, evidence is accumulating that sexual minorities carry a  
17 disproportionate burden of cancer, therefore calls are growing louder that cancer registries and  
18 SEER ought to collect sexual orientation data to adequately fulfill their mission of monitoring  
19 population health, which has to include sexual minority populations as well.  
20  
21  
22  
23  
24  
25  
26  
27  
28  
29  
30  
31  
32  
33  
34  
35  
36  
37  
38  
39  
40  
41  
42  
43  
44  
45  
46  
47  
48  
49  
50  
51  
52  
53  
54  
55  
56  
57  
58  
59  
60

1  
2  
3 **Acknowledgments:** This work was supported by the National Cancer Institute at the National  
4  
5  
6 Institutes of Health (grant number 1 R03 CA153063-01).

7  
8 **Conflict of interests:** None declared

9  
10 **Data sharing agreement:** There is no additional data available.

11  
12 **Contributor Statement:** U Boehmer originated the study and interpreted the findings. X Miao  
13  
14 conducted the analyses and helped to interpret the findings. N Maxwell led the writing. A  
15  
16 Ozonoff used his statistical expertise to direct the analysis and helped to interpret the findings.  
17  
18 All authors contributed in significant ways to the final article by discussing earlier drafts,  
19  
20 reviewing, and revising the manuscript.  
21  
22  
23  
24  
25  
26  
27  
28  
29  
30  
31  
32  
33  
34  
35  
36  
37  
38  
39  
40  
41  
42  
43  
44  
45  
46  
47  
48  
49  
50  
51  
52  
53  
54  
55  
56  
57  
58  
59  
60

## References

- 1 U.S. Cancer Statistics Working Group. United States Cancer Statistics: 1999–2008 Incidence and Mortality Web-based Report. . Atlanta, GA: Department of Health and Human Services, Centers for Disease Control and Prevention, and National Cancer Institute 2012.
- 2 IARC Working Group on the Evaluation of Cancer Preventive Strategies. *Weight Control and Physical Activity*. Lyon, France: IARC Press 2001.
- 3 Ryan H, Wortley PM, Easton A, *et al*. Smoking among lesbians, gays, and bisexuals: a review of the literature. *Am J Prev Med* 2001;**21**:142-9.
- 4 Tang H, Greenwood GL, Cowling DW, *et al*. Cigarette smoking among lesbians, gays, and bisexuals: how serious a problem? (United States). *Cancer Causes Control* 2004;**15**:797-803.
- 5 Burgard SA, Cochran SD, Mays VM. Alcohol and tobacco use patterns among heterosexually and homosexually experienced California women. *Drug Alcohol Depend* 2005;**77**:61-70.
- 6 The President's Cancer Panel. Promoting Healthy Lifestyles: Policy, Program, and Personal Recommendations for Reducing Cancer Risk. Annual Report 2006-2007. In: Panel TPsC, ed. Bethesda, MD: U.S. Department of Health and Human Services, 2007.
- 7 Lee JG, Griffin GK, Melvin CL. Tobacco use among sexual minorities in the USA, 1987 to May 2007: a systematic review. *Tob Control* 2009;**18**:275-82.
- 8 Duplicate. Adult health behaviors in different age cohorts by sexual orientation. *Am J Public Health* 2012;**102**:292-300.

- 1  
2  
3 9 Cochran SD, Keenan C, Schober C, *et al.* Estimates of alcohol use and clinical treatment  
4 needs among homosexually active men and women in the U.S. population. *J Consult Clin*  
5  
6 *Psychol* 2000;**68**:1062-71.  
7  
8  
9  
10 10 Cochran SD, Mays VM, Bowen D, *et al.* Cancer-related risk indicators and preventive  
11 screening behaviors among lesbians and bisexual women. *Am J Public Health* 2001;**91**:591-7.  
12  
13  
14 11 Gilman SE, Cochran SD, Mays VM, *et al.* Risk of psychiatric disorders among  
15 individuals reporting same-sex sexual partners in the National Comorbidity Survey. *Am J Public*  
16 *Health* 2001;**91**:933-9.  
17  
18  
19  
20 12 Drabble L, Midanik LT, Trocki K. Reports of alcohol consumption and alcohol-related  
21 problems among homosexual, bisexual and heterosexual respondents: results from the 2000  
22 National Alcohol Survey. *J Stud Alcohol* 2005;**66**:111-20.  
23  
24  
25  
26 13 Valanis BG, Bowen DJ, Bassford T, *et al.* Sexual orientation and health: Comparisons in  
27 the women's health initiative sample. *Arch Fam Med* 2000;**9**:843-53.  
28  
29  
30  
31 14 Case P, Bryn Austin S, Hunter DJ, *et al.* Sexual Orientation, Health Risk Factors, and  
32 Physical Functioning in the Nurses' Health Study II. *J Womens Health* 2004;**13**:1033-47.  
33  
34  
35  
36 15 Boehmer U, Bowen DJ. Examining factors linked to overweight and obesity in women of  
37 different sexual orientations. *Prev Med* 2009;**48**:357-61.  
38  
39  
40  
41 16 Boehmer U, Bowen DJ, Bauer GR. Overweight and obesity in sexual minority women:  
42 evidence from population-based data. *Am J Public Health* 2007;**97**:1134-40.  
43  
44  
45  
46 17 Deputy NP, Boehmer U. Determinants of body weight among men of different sexual  
47 orientation. *Prev Med* 2010;**51**:129-31.  
48  
49  
50  
51 18 Rankow EJ, Tessaro I. Mammography and Risk Factors for Breast Cancer in Lesbian and  
52 Bisexual Women. *American Journal of Health Behavior* 1998;**22**:403-10.  
53  
54  
55  
56  
57  
58  
59  
60

- 1  
2  
3 19 Kavanaugh-Lynch MHE, White E, *et al.* Correlates of lesbian sexual orientation and the  
4 risk of breast cancer. *J Gay Lesbian Med Assoc* 2002;**6**:91-5.  
5  
6  
7  
8 20 Dibble SL, Roberts SA, Nussey B. Comparing breast cancer risk between lesbians and  
9 their heterosexual sisters. *Womens Health Issues* 2004;**14**:60-8.  
10  
11  
12 21 Boehmer U, Ozonoff A, Timm A. County-level association of sexual minority density  
13 with breast cancer incidence: results from an ecological study. *Sex Res Social Policy* 2011;**8**:139-  
14 45.  
15  
16  
17  
18 22 Boehmer U, Ozonoff A, Miao X. An ecological analysis of colorectal cancer incidence  
19 and mortality: Differences by sexual orientation. *BMC Cancer* 2011;**11**:400.  
20  
21  
22  
23 23 Boehmer U, Ozonoff A, Miao X. An ecological approach to examine lung cancer  
24 disparities due to sexual orientation. *Public Health* 2012;**126**:605-12.  
25  
26  
27  
28 24 Steele LS, Ross LE, Dobinson C, *et al.* Women's sexual orientation and health: results  
29 from a Canadian population-based survey. *Women Health* 2009;**49**:353-67.  
30  
31  
32  
33 25 Brewster KL, Tillman KH. Sexual Orientation and Substance Use Among Adolescents  
34 and Young Adults. *Am J Public Health* 2012;**102**:1168-76.  
35  
36  
37  
38 26 Tjepkema M. Health care use among gay, lesbian and bisexual Canadians. *Health Rep*  
39 2008;**19**:53-64.  
40  
41  
42  
43 27 Kertzner RM, Meyer IH, Frost DM, *et al.* Social and psychological well-being in  
44 lesbians, gay men, and bisexuals: the effects of race, gender, age, and sexual identity. *Am J*  
45 *Orthopsychiatry* 2009;**79**:500-10.  
46  
47  
48  
49 28 Lee S, Brown ER, Grant D, *et al.* Exploring Nonresponse Bias in a Health Survey Using  
50 Neighborhood Characteristics. *Am J Public Health* 2009;**99**:1811-7.  
51  
52  
53  
54  
55  
56  
57  
58  
59  
60

- 1  
2  
3  
4  
5  
6  
7  
8  
9  
10  
11  
12  
13  
14  
15  
16  
17  
18  
19  
20  
21  
22  
23  
24  
25  
26  
27  
28  
29  
30  
31  
32  
33  
34  
35  
36  
37  
38  
39  
40  
41  
42  
43  
44  
45  
46  
47  
48  
49  
50  
51  
52  
53  
54  
55  
56  
57  
58  
59  
60
- 29 Singh G, Miller B, Hankey B, *et al.* Area Socioeconomic Variations in U.S. Cancer Incidence, Mortality, Stage, Treatment, and Survival, 1975–1999. *NCI Cancer Surveillance Monograph Series*. Bethesda, MD: National Cancer Institute 2003.
- 30 Krieger N, Chen JT, Waterman PD, *et al.* Painting a truer picture of US socioeconomic and racial/ethnic health inequalities: the Public Health Disparities Geocoding Project. *Am J Public Health* 2005;**95**:312-23.
- 31 Institute of Medicine. *The Health of Lesbian, Gay, Bisexual, and Transgender People: Building a Foundation for Better Understanding*. Washington, DC: The National Academies Press. 2011.
- 32 Bauer GR, Jaram JA. Are lesbians really women who have sex with women (WSW)? Methodological concerns in measuring sexual orientation in health research. *Women Health* 2008;**48**:383-408.
- 33 Fredriksen-Goldsen KI, Kim H-J, Barkan SE, *et al.* Disparities in Health-Related Quality of Life: A Comparison of Lesbians and Bisexual Women. *Am J Public Health* 2010;**100**:2255-61.
- 34 Herek G, Norton A, Allen T, *et al.* Demographic, Psychological, and Social Characteristics of Self-Identified Lesbian, Gay, and Bisexual Adults in a US Probability Sample. *Sex Res Social Policy* 2010;**7**:176-200.
- 35 Greenberg JA. Health Care Issues Affecting People with an Intersex Condition or DSD: Sex or Disability Discrimination? *Loyola of Los Angeles Law Review* 2012;**45**:849.
- 36 Cochran SD, Mays VM. Risk of Breast Cancer Mortality Among Women Cohabiting with Same Sex Partners: Findings from the National Health Interview Survey, 1997-2003. *J Women's Health* 2012;**21**:528-33.

1  
2  
3  
4  
5  
6  
7  
8  
9  
10  
11  
12  
13  
14  
15  
16  
17  
18  
19  
20  
21  
22  
23  
24  
25  
26  
27  
28  
29  
30  
31  
32  
33  
34  
35  
36  
37  
38  
39  
40  
41  
42  
43  
44  
45  
46  
47  
48  
49  
50  
51  
52  
53  
54  
55  
56  
57  
58  
59  
60

For peer review only

**Table 1** *Multivariate Poisson Regression Analysis for Male Lung Cancer†*

| Predictors                      | Regression coefficient estimate | IRR    | 95% CI of IRR |       | p-value |
|---------------------------------|---------------------------------|--------|---------------|-------|---------|
| Gay density                     | 0.0004                          | 1.0004 | 0.995         | 1.006 | 0.88    |
| Bisexual density                | -0.0875                         | 0.916  | 0.897         | 0.936 | <0.0001 |
| Hispanic vs. non-Hispanic white | -0.4243                         | 0.654  | 0.637         | 0.672 | <0.0001 |
| Asian/PI vs. non-Hispanic white | -0.0674                         | 0.935  | 0.910         | 0.960 | <0.0001 |
| Other vs. non-Hispanic white    | -0.0537                         | 1.055  | 1.025         | 1.086 | 0.0003  |
| Poverty                         | 0.0134                          | 1.014  | 1.012         | 1.015 | <0.0001 |

† results also adjusted for age



**Table 2** *Multivariate Poisson Regression Analysis for Male Colorectal Cancer†*

| Predictors                      | Regression coefficient estimate | IRR   | 95% CI of IRR |       | p-value |
|---------------------------------|---------------------------------|-------|---------------|-------|---------|
| Gay density                     | -0.0020                         | 0.998 | 0.993         | 1.003 | 0.45    |
| Bisexual density                | 0.0262                          | 1.027 | 1.004         | 1.050 | 0.02    |
| Hispanic vs. non-Hispanic white | 0.0411                          | 1.042 | 1.018         | 1.067 | 0.0006  |
| Asian/PI vs. non-Hispanic white | 0.1056                          | 1.111 | 1.082         | 1.142 | <0.0001 |
| Other vs. non-Hispanic white    | 0.0942                          | 1.099 | 1.065         | 1.134 | <0.0001 |
| Poverty                         | 0.0038                          | 1.004 | 1.002         | 1.006 | <0.0001 |

† results also adjusted for age

**Table 3** *Multivariate Poisson Regression Analysis for Female Lung Cancer*<sup>†</sup>

| Predictors                      | Regression coefficient estimate | IRR   | 95% CI of IRR |       | p-value |
|---------------------------------|---------------------------------|-------|---------------|-------|---------|
| Lesbian density                 | -0.0521                         | 0.949 | 0.928         | 0.971 | <0.0001 |
| Bisexual density                | 0.1067                          | 1.113 | 1.078         | 1.149 | <0.0001 |
| Hispanic vs. non-Hispanic white | -0.7012                         | 0.496 | 0.482         | 0.511 | <0.0001 |
| Asian/PI vs. non-Hispanic white | -0.5264                         | 0.591 | 0.573         | 0.609 | <0.0001 |
| Other vs. non-Hispanic white    | -0.1527                         | 0.858 | 0.832         | 0.885 | <0.0001 |
| Poverty                         | 0.0013                          | 1.001 | 0.999         | 1.003 | 0.18    |

<sup>†</sup> results also adjusted for age

**Table 4** *Multivariate Poisson Regression Analysis for Female Colorectal Cancer*<sup>†</sup>

| Predictors                      | Regression coefficient estimate | IRR   | 95% CI of IRR |       | p-value |
|---------------------------------|---------------------------------|-------|---------------|-------|---------|
| Lesbian density                 | -0.0290                         | 0.971 | 0.950         | 0.993 | 0.0095  |
| Bisexual density                | 0.0268                          | 1.027 | 0.994         | 1.062 | 0.1105  |
| Hispanic vs. non-Hispanic white | -0.0670                         | 0.932 | 0.909         | 0.957 | <0.0001 |
| Asian/PI vs. non-Hispanic white | 0.1133                          | 1.120 | 1.090         | 1.151 | <0.0001 |
| Other vs. non-Hispanic white    | 0.1616                          | 1.175 | 1.139         | 1.213 | <0.0001 |
| Poverty                         | 0.0020                          | 1.002 | 1.000         | 1.004 | 0.056   |

<sup>†</sup> results also adjusted for age

**Table 5** *Multivariate Poisson Regression Analysis for Female Breast Cancer*<sup>†</sup>

| Predictors                      | Regression coefficient estimate | IRR   | 95% CI of IRR |       | p-value |
|---------------------------------|---------------------------------|-------|---------------|-------|---------|
| Lesbian density                 | 0.0225                          | 1.023 | 1.014         | 1.031 | <0.0001 |
| Bisexual density                | -0.0328                         | 0.968 | 0.955         | 0.981 | <0.0001 |
| Hispanic vs. non-Hispanic white | -0.2691                         | 0.764 | 0.755         | 0.774 | <0.0001 |
| Asian/PI vs. non-Hispanic white | -0.1790                         | 0.836 | 0.824         | 0.848 | <0.0001 |
| Other vs. non-Hispanic white    | -0.2533                         | 0.776 | 0.763         | 0.790 | <0.0001 |
| Poverty                         | -0.0106                         | 0.990 | 0.989         | 0.991 | <0.0001 |

<sup>†</sup> results also adjusted for age

1  
2  
3  
4  
5  
6  
7  
8  
9  
10  
11  
12  
13  
14  
15  
16  
17  
18  
19  
20  
21  
22  
23  
24  
25  
26  
27  
28  
29  
30  
31  
32  
33  
34  
35  
36  
37  
38  
39  
40  
41  
42  
43  
44  
45  
46  
47  
48  
49  
50  
51  
52  
53  
54  
55  
56  
57  
58  
59  
60

Figure1. Comparing results for different sexual minority density measures

For peer review only

1  
2  
3 **Research Article**  
4

5 **Sexual Minority Population Density and Incidence of Lung, Colorectal, and Female Breast**  
6  
7  
8 **Cancer in California**  
9

10 Running title: Sexual Minority Density and Incidence  
11

12  
13  
14  
15 Ulrike Boehmer<sup>1\*</sup>, Xiaopeng Miao<sup>2</sup>, Nancy I Maxwell<sup>1</sup>, Al Ozonoff<sup>3</sup>  
16

17 <sup>1</sup> Department of Community Health Sciences, Boston University School of Public Health,  
18  
19 Boston, MA 02118 USA  
20

21 <sup>2</sup> Department of Biostatistics, Boston University School of Public Health, Boston, MA  
22  
23 02118 USA  
24

25 <sup>3</sup> ~~Clinical Research Program~~ Center for Patient Safety and Quality Research, Boston  
26  
27  
28 Children's Hospital-Boston, 300 Longwood Avenue, Boston, MA 021215, USA  
29  
30  
31

32  
33  
34 \* Corresponding Author  
35

36 Ulrike Boehmer, Ph.D.  
37

38 Department of Community Health Sciences  
39

40 Boston University School of Public Health  
41

42  
43 801 Massachusetts Avenue, Crosstown Center  
44

45  
46 Boston, MA 02118  
47

48 USA  
49

50 Phone 617-638-5835  
51

52 Fax 617-638-4483  
53

54  
55 Email [boehmer@bu.edu](mailto:boehmer@bu.edu)  
56  
57  
58  
59  
60

## ABSTRACT

Objective: Risk factors for breast, colorectal, and lung cancer are known to be more common among lesbian, gay, and bisexual (LGB) individuals, suggesting they may more likely develop these cancers. Our objective was to determine differences in cancer incidence by sexual orientation, using ~~aggregate~~ sexual orientation data aggregated at the county-level.

Methods: Data on cancer incidence were obtained from the California Cancer Registry and data on sexual orientation were obtained from the California Health Interview Survey, from which a measure of age-specific LGB population density by county was calculated. Using multivariable Poisson regression models the association between the age-race-stratified ~~count of~~ incident rate of breast, lung, and colorectal cancer ~~cases~~ in each county and LGB population density was examined, with race, age group, and poverty as covariates.

Results: Among males, bisexual population density was associated with lower incidence of lung cancer and with higher incidence of colorectal cancer. Among females, lesbian population density was associated with lower incidence of lung and colorectal cancer, and with higher incidence of breast cancer; bisexual population density was associated with higher incidence of lung and colorectal cancer, and with lower incidence of breast cancer.

Conclusions: These study findings clearly document links between county-level LGB population density ~~measures~~ and cancer incidence, illuminating an important public health disparity.

Keywords: Homosexuality, cancer incidence, breast cancer, colorectal cancer, lung cancer, disparities, sex differences

## ARTICLE SUMMARY

### Strengths and limitations of this study

- ~~Variation in cancer incidence due to~~ Using sexual orientation population data aggregated at the county-level findings identify point to associations between cancer incidence and sexual minority population density differences by sexual orientation group.
- These county-level differences in cancer incidence ~~provide information suggest a need~~ for public health planning, previously unavailable.
- Because cancer registries do not document sexual orientation, ~~D~~etermining whether disparities exist in cancer incidence due to sexual orientation is not possible otherwise; ~~because cancer registries do not document sexual orientation.~~
- ~~Study findings have the inherent limitations of the ecologic study design.~~
- Because data are at the county level, it is not possible to link sexual minority status to cancer risk at the level of the individual.
- Study findings have the inherent limitations of the ecologic study design.



## INTRODUCTION

Lung, colorectal, and female breast cancer are three of the most commonly diagnosed cancers in the United States, with incidence rates of 79.5, 51.6, and 121.9 per 100,000, respectively, in 2008. [1] Smoking and alcohol use are well-known risk factors for all three of these cancers; overweight and/or obesity has been linked to risk of female breast cancer and colorectal cancer. [2] In addition, nulliparity is associated with increased risk of female breast cancer.

Research also indicates that the prevalence of these well-known risk factors is generally higher among sexual minority individuals—that is, lesbian, gay, and bisexual individuals. Smoking is more common among sexual minorities, both men and women, than among their heterosexual counterparts.[3-8] Further, in 2007 the President’s Cancer Panel found that sexual minority youths smoke at rates as high as those of adults, and tend to start smoking at a younger age than heterosexual youths.[6] Sexual minority women are more likely than heterosexual women to drink alcohol [5, 8-12] and to be overweight or obese.[10, 13-16] In contrast, gay men’s alcohol use has not been shown to differ from that of heterosexual men,[12] and gay men are less likely than heterosexual men to be overweight or obese. [17] Finally, sexual minority women have higher rates of nulliparity than heterosexual women. [10, 13, 14, 18-20]

Because cancer registries do not collect information on the sexual orientation of individuals diagnosed with cancer, it cannot be readily determined from SEER or state registry data whether cancer is more prevalent among individuals with a sexual minority orientation. To overcome this lack of data on cancer disparities by sexual orientation, three previous studies used county-level ecologic analyses to relate breast, lung, and colorectal cancer incidence to greater density of sexual minority individuals-population density [21-23]. Previously, we used Using

1  
2  
3 SEER registry data and US Census data on ~~the prevalence of individuals living in~~ same-sex  
4 partnered households as ~~the a~~ proxy measure for sexual minority orientation.<sup>5</sup> ~~†~~ These ecological  
6 studies concluded that greater female sexual minority density (SMD) in a county is associated  
7  
8 with greater incidence of breast and colorectal cancer [21, 22], while there was a negative  
9  
10 relationship between female sexual minority population density and lung cancer incidence [23].  
11  
12 Greater density of sexual minority men was associated with higher incidence of lung and  
13  
14 colorectal cancer [22, 23].  
15  
16  
17  
18  
19

20 While US census data on same-sex households are a well-established proxy for sexual  
21 orientation, these data also have known limitations. From available Census data, we can  
22  
23 enumerate households led by same-sex adults, but this surely represents an undercount since we  
24  
25 capture only sexual minority individuals who live with a same-sex partner, thereby excluding  
26  
27 sexual minority individuals who are living alone or with non-partners. Further, we do not know  
28  
29 how many members of a same-sex partnered household identify as lesbian, gay, or bisexual. In  
30  
31 particular, it is impossible to assess lesbians separately from bisexual women or to assess gay  
32  
33 men separately from bisexual men. This is an important limitation, because studies that analyzed  
34  
35 lesbian women separately from bisexual women concluded bisexuals fare worse on some health  
36  
37 indicators than both heterosexual and lesbian women [24-27].  
38  
39  
40  
41  
42

43 To address the limitations of US Census data, the present study traded a national scope  
44  
45 for an improved measure of sexual minority density. We used statewide population-based data  
46  
47 on sexual minority identity (gay, lesbian, or bisexual) to estimate its relationship to colorectal  
48  
49 cancer, lung cancer, and female breast cancer incidence.  
50  
51  
52  
53  
54  
55  
56  
57  
58  
59  
60

## MATERIALS AND METHODS

The Institutional Review Board deemed this study exempt from protocol review. Data for this research project were taken from the California Health Interview Survey (CHIS), the largest state health survey conducted in the US. The CHIS employs a two-stage geographically stratified random-digit-dial (RDD) sample of households, surveying one randomly selected adult from each sampled household. The survey is administered in multiple languages, resulting in a large multiethnic/multiracial sample that accurately represents the California population living in households. The CHIS response rate shows no significant nonresponse bias by demographic characteristics such as age, sex, income, education, or employment status [28]; however, due to the absence of a sampling frame, nonresponse by sexual orientation has not been evaluated.

More detailed information about the survey methodology can be obtained from the website:

<http://www.chis.ucla.edu/>. The CHIS collects information ~~biennially~~biennially, including data on sexual orientation. To ascertain sexual orientation, respondents were asked about their sexual identity, with response choices of heterosexual, lesbian, gay, or bisexual along with celibate or other, while recording refusals and don't know responses. We combined four years of data, using the adult CHIS surveys from 2001, 2003, 2005, and 2007 to increase the numbers of individuals who report a sexual minority orientation, defined as gay, lesbian, or bisexual.

Data on cancer incidence were taken from the California Cancer Registry, which records all cancer cases to monitor the occurrence of cancer among Californians. We chose the cancer data for the years 2001-2008 because these years cover the same timeframe as the CHIS sexual minority data. We further restricted our data to men and women aged 18 to 84, because we focused on adult cancers and also because this is the age range for which the CHIS had sexual orientation data available. ~~In 2001-2008, among women aged 18-84 in the 58 counties of~~

1  
2  
3 California, 206,012 were newly diagnosed with breast, 59,182 with lung, and 50,123 with  
4 colorectal cancer. Over the same number of years, among men aged 18-84, there were 62,673  
5  
6  
7  
8 new diagnoses of lung cancer and 55,624 of colorectal cancer.  
9

10 Because there are differences in cancer incidence by age and race, we used the population  
11 data from Census 2000 since it has age- and race- specific population data available for all the 58  
12 counties in California. From the Census, we also obtained county-level data on poverty, another  
13 important confounder of cancer incidence.  
14  
15  
16  
17  
18  
19

## 20 Measures

21  
22 Counts of breast, lung, and colorectal cancer incidence were classified into one of 11 age  
23 categories and four race/ethnicity groups. The 11 age categories were 18-24, 25-29, 30-34, 35-  
24 39, 40-44, 45-49, 50-54, 55-59, 60-64, 65-69 and 70-84, while race and ethnicity consisted of (1)  
25 Non-Hispanic White, (2) Hispanic, (3) Asian/Pacific Islander, and (4) other race/ethnicity. The  
26 group of other race/ethnicity combines non-Hispanic Blacks (6.79% of cancers), other/unknown  
27 race/ethnicity (0.73% of cancers) and non-Hispanic American-Indian (0.14 % of cancers). We  
28 calculated each cancer incidence rate using the total female and male population between age 18  
29 and 84 in each county using the Census data.  
30  
31  
32  
33  
34  
35  
36  
37  
38  
39  
40  
41

42 We adjusted for poverty level in our analyses, with poverty level being defined as the  
43 percentage of the population living under the Federal poverty level, which has been found to be  
44 the most consistent, easily interpretable variable which accurately measures socioeconomic  
45 disparities in health outcomes [29, 30].  
46  
47  
48  
49  
50

51 Our main independent variable is derived from CHIS data on participants' sexual  
52 orientation. We are using these data aggregated at the county-level and call this aggregate  
53 variable 'sexual minority density' (SMD) ~~because it to expresses the~~ variation in the density ~~with~~  
54  
55  
56  
57  
58  
59  
60

1  
2  
3 ~~which residents of a county report as of~~ sexual minority populations in a counties. To make  
4  
5 these data age-specific, we obtained the distribution of sexual minorities, defined as lesbians,  
6  
7 gays, or bisexuals, across different age groups, and combined this information with the county-  
8  
9 level SMD. Specifically, we obtained the weighted percentage of gay men in a specific age  
10  
11 group (denoted as `ageweight_gay`), using the age information on all gay men in the 58 California  
12  
13 counties. Then, we obtained the weighted percentage of all men in the specific age group  
14  
15 (denoted as `ageweight_all`), using the age information on all subjects in the 58 California  
16  
17 counties. Finally, we obtained the count of all adult gay men (`Ngay`) and the count of all adult  
18  
19 men (`Nall`) in the specific age group, and computed the age-specific gay density as:

$$\text{Age-specific gay density} = \frac{N_{\text{gay}} * \text{ageweight}_{\text{gay}}}{N_{\text{all}} * \text{ageweight}_{\text{all}}}$$

27  
28 The age-specific lesbian and bisexual population density was computed in a similar way, and we  
29  
30 considered bisexual men and women as distinct categories for analyses.

31  
32  
33 Regression diagnostics indicated that the Los Angeles County, white race, age 70-84,  
34  
35 data point was a potentially influential point. We refit all regression models excluding this data  
36  
37 point to ensure that our findings are not predominantly dependent on a single observation. Model  
38  
39 fit did not improve substantially with the exclusion, and more importantly, changes in estimates  
40  
41 of associations between the density measures and cancer incidence were small and well within  
42  
43 the standard errors. Therefore, we report all regression results with no data exclusions. We  
44  
45 adjusted for poverty level in our analyses, with poverty level being defined as the percentage of  
46  
47 the population living under the Federal poverty level, which has been found to be the most  
48  
49 consistent, easily interpretable variable which accurately measures socioeconomic disparities in  
50  
51 health outcomes [29, 30].  
52  
53  
54  
55  
56  
57  
58  
59  
60

## Statistical Analysis

~~Descriptive statistics summarized variation in adult cancer incidence by gender and race.~~  
We used descriptive statistics to summarize our outcomes, cancer incidence, and our main independent variables, that is, lesbian, gay, or bisexual population density, for all 58 California counties. We assessed county-level association between lesbian/gay/bisexual density (LGBD) and cancer incidence rates using multivariable Poisson regression models with the age-race-stratified count of incident cases in each county as the dependent variable, and the LGBD, race, age group and US Census percent in poverty as covariates. We fitted models that considered L/G and B together because the correlation between lesbian/gay density and bisexual density was low—0.36 ( $p < 0.0001$ ) for women and 0.15 ( $p < 0.0001$ ) for men and because our primary parameter estimates remained essentially unchanged, when we fitted the two density measures separately—we fitted models that considered L/G and B together. The All model selections was were based on the goodness-of-fit of the models assessed by the Akaike Information Criterion (AIC) and residual diagnostics plots. SAS PROC GENMOD was used to fit the models, with the offset term as the logarithm of the US Census age-race-stratified total adult population in the county. The incidence rate ratio (IRR) was presented as the measure of the effect of each predictor, along with its 95% confidence interval and p-value. The validity of the assumptions and the goodness-of-fit of the assumed models were assessed by residual diagnostic plots and goodness-of-fit statistics such as the Deviance statistic. All analyses were done in SAS 9.2 (SAS Institute Inc, Cary NC, USA).

~~Regression diagnostics indicated that the Los Angeles County, white male, age 70-84, data point was a potentially influential point. We refit all regression models excluding this data~~

~~point a single observation Model with the exclusion, changes in estimates of were small and well within the standard errors report all regression results with no data exclusions.~~

## RESULTS

~~There is considerable variation in the sexual minority density measures by county. Across 58 California counties, the lesbian density measure ranges from 0 to 3.05 (Median=0.49; Mean=0.66; SD=0.78) and the bisexual density measure from 0 to 4.16 (Median=1.24; Mean=1.16; SD=0.97). Gay and bisexual male density measures respectively range from 0 to 16.02 (Median=0.80; Mean=1.10; SD=2.19) and from 0 to 4.07 (Median=0.44; Mean=0.60; SD=0.76).~~

~~We describe age-adjusted regression results for measures of sexual minority density, race/ethnicity, and poverty as predictors of cancer incidence.~~

### Sexual orientation, demographics, and cancer incidence among males

Controlling for race/ethnicity and poverty, gay density was not associated with county-level lung cancer incidence among males (Table 1), although bisexual density was associated with an 8.4 percent decrease in lung cancer incidence (IRR=0.916,  $p<0.0001$ ). There were expected significant associations between self-reported race/ethnic category and incidence, and a positive association between poverty and lung cancer incidence ~~was weaker but still statistically significant. After excluding the Los Angeles County outlier from the regression model for male lung cancer, the associations were unchanged in strength and significance between gay/ bisexual density and lung cancer.~~

1  
2  
3 Controlling for race/ethnicity and poverty, gay density was not significantly associated  
4 with colorectal cancer incidence (Table 2), but bisexual density among males was associated  
5 with a 2.7% increase in incidence of colorectal cancer (IRR=1.027, p=0.02).  
6  
7  
8  
9

### 10 11 **Sexual orientation, demographics, and cancer incidence among females**

12  
13  
14 Controlling for race/ethnicity and poverty, each one-~~percentage point~~ unit increase in  
15 lesbian density was associated with a 5.1% decrease in incidence of lung cancer (IRR=0.949,  
16 p<0.0001; Table 3), whereas each one- unit increase in bisexual density was associated with an  
17 11.3% increase (IRR=1.113, p<0.0001). There were significant negative association between  
18 female lung cancer incidence and Hispanic, Asian/Pacific Islander and Other race. There was no  
19 significant association between female lung cancer incidence and poverty.  
20  
21  
22  
23  
24  
25  
26  
27

28 Controlling for race/ethnicity and poverty, each one- unit increase in lesbian density was  
29 associated with a 2.9% decrease in the incidence of colorectal cancer among women  
30 (IRR=0.971, p=0.0095; Table 4); bisexual density was not associated with incidence of  
31 colorectal cancer among women. Hispanic ethnicity had a significant negative association,  
32 Asian/Pacific Islander and Other race had a significant positive association with incidence of  
33 colorectal cancer among women. Poverty was not significantly associated with incidence of  
34 colorectal cancer in females.  
35  
36  
37  
38  
39  
40  
41  
42  
43  
44

45 Controlling for race/ethnicity and poverty, each one-unit increase in lesbian density was  
46 significantly associated with a 2.3% increase, and bisexual density with a 3.2 % decrease, in  
47 incidence of female breast cancer (lesbian: IRR=1.023, p<0.0001; bisexual: IRR=0.968,  
48 p<0.0001; Table 5). Hispanic, Asian/Pacific Islander, and Other race/ethnicity had significant  
49 negative associations with breast cancer incidence. Poverty was modestly but significantly  
50 associated with decreased breast cancer incidence.  
51  
52  
53  
54  
55  
56  
57  
58  
59  
60



~~Excluding Los Angeles County from the regression model resulted in little change to the results for female breast cancer, female lung cancer, and female colorectal cancer.~~

## DISCUSSION

This study's findings document disparities in the age-adjusted incidence of three cancers across the counties of California: disparities that are associated with the density of sexual minorities, controlling for race/ethnicity and the prevalence of poverty. Our outcome measure provides effect estimates in the form of the percentage change in cancer incidence per one unit increase in sexual minority population density, ~~and thus an IRR that is only modestly different from 1.0 may represent a substantial difference in real-world terms, given the variation in gay and lesbian densities across counties.~~

Among males, bisexual density (but not gay density) was significantly associated with cancer incidence. Specifically, bisexual density was associated with lower incidence of lung cancer and, less strongly, with higher incidence of colorectal cancer. Among females, lesbian density (but not bisexual density) was significantly associated with colorectal cancer. ~~Among females, b~~Both lesbian and bisexual density were significantly associated with female breast and lung cancer incidence. However, ~~across all three cancers,~~ these two associations were opposite in direction: ~~lesbian density was associated with lower incidence of lung and colorectal cancer, and with~~ higher incidence of breast cancer; bisexual density was associated with higher incidence of lung and ~~colorectal cancer, and with~~ lower incidence of breast cancer. ~~The strongest associations between sexual orientation and cancer incidence, and thus the greatest gap between findings by sexual orientation, were for lung cancer: lesbian density is associated with a 5.1% decrease, and bisexual density with an 11.3% increase, in lung cancer incidence per one-unit increase in sexual minority density.~~ For each of the cancer outcome we studied, Los

1  
2  
3 Angeles county, white race, and age 70-84 emerged as an influential outlying data point.

4 Because Los Angeles county is also the most populous county in California, initially this raised

5 concerns for us about we carefully considered issues around the robustness of our results.

6  
7  
8 However, because our findings barely changed after the removal of this data point, we were

9  
10  
11 conducted a sensitivity analysis, which suggests ~~reassured that~~ our findings are not overly

12  
13 dependent on ~~the~~ this single data point of Los Angeles county, white race, and age 70-84,

14  
15  
16 speaking ~~ending~~ strength to the overall reliability of our findings.

17  
18  
19  
20 ~~These~~ The differences between results for lesbian/gay density and bisexual density are  
21 consistent with an increasing understanding among sexual orientation researchers that—after  
22 years of combining lesbian/gay and bisexual individuals into one group due to small sample  
23 sizes—differences between these groups come to the forefront once they are separated [8, 31-  
24 34]. These findings reflect methodological improvements on our previous studies of sexual  
25 minority density and cancer incidence [21-23]: those analyses used U.S. Census data on whether  
26 a respondent lived in a same-sex partnered household, whereas data for the current analysis rest  
27 on self-reported sexual identity from the California Health Interview Survey, as described above,  
28 and distinguish between gay/lesbian and bisexual respondents. A comparison of findings from  
29 our other analyses to those of this study shows a mix of consistencies and inconsistencies ;

30  
31  
32 ~~partly attributable to this improvement in the ascertainment of sexual minority orientation, the~~  
33  
34  
35  
36  
37  
38  
39  
40  
41  
42 ~~ability to distinguish lesbian/gay density from bisexual density.~~

43  
44  
45  
46  
47  
48 [insert Figure 1]

49  
50  
51 Using SEER data, colorectal cancer incidence was significantly and positively associated  
52 with both sexual minority men density and sexual minority women density [22]; that finding  
53 aligns with this study's finding for male and female bisexual density and colorectal cancer, but is

1  
2  
3 inconsistent with the present findings for gay and lesbian density. In the present study, we  
4 identified among males no association between gay density and lung cancer, and a negative  
5 association between bisexual density and lung cancer; this conflicts with our finding of a positive  
6 association for sexual minority men density and lung cancer using a different dataset [23]. For  
7 female lung cancer, our current findings for lesbian women are consistent with our previous  
8 finding of a significant negative association between lung cancer and sexual minority women  
9 density [23], although the present study also found a positive association with bisexual density  
10 specifically. Finally, findings for breast cancer show some consistency: in the present study,  
11 lesbian density has a significant positive association with breast cancer incidence, confirming our  
12 earlier findings [21], although the present study also identified a negative association with  
13 bisexual density.  
14  
15  
16  
17  
18  
19  
20  
21  
22  
23  
24  
25  
26  
27  
28

29 A number of factors are likely to contribute to differences between results of earlier  
30 Census-based analyses, which did not distinguish between gays/lesbians and bisexuals, and those  
31 of the present study, which relied on self-reported sexual identity. The Census data on same-sex  
32 partnered households are probably better indicators of gay and lesbian than bisexual individuals,  
33 given data showing that the majority of partnered gay and lesbian individuals have a same-sex  
34 partner, whereas partnered bisexual individuals are more likely to be in heterosexual  
35 relationships [34]. The present study's ability to distinguish lesbian/gay density from bisexual  
36 density, is an improvement in the ascertainment of sexual minority orientation. This likely  
37 accounts for identifying effects that are opposite in direction, as for example lesbian density's  
38 association with a 5.1% decrease and bisexual density's 11.3% increase in lung cancer incidence.  
39  
40  
41  
42  
43  
44  
45  
46  
47  
48  
49  
50  
51  
52

53 Another factor may be the relative size of the subgroups within the LGB adult population:  
54 among women, more identify as bisexual than lesbian, whereas among men, more identify as gay  
55  
56  
57  
58  
59  
60

1  
2  
3 [35]. Differences in the findings of this study compared to the earlier studies are also attributable  
4 to the difference in geographic scope. The present study is limited to cancer incidence in  
5  
6 California, while the previous SEER-based study was representative of the United States. ~~Given~~  
7  
8 ~~the difference in geographic scope~~ Moreover, the earlier studies used a roughly fourfold larger  
9  
10 sample (215 counties compared to the present study's 58 counties); thus in the current study we  
11  
12 had lower statistical power to detect associations. Both ecological studies failed to achieve a  
13  
14 complete ascertainment of sexual minority status, albeit for different reasons; the Census-based  
15  
16 studies relied on an enumeration of same-sex partnered individuals, while the present study  
17  
18 relied on population estimates of sexual identity. Methodological differences aside, there may be  
19  
20 real-world differences between California and the country as a whole in connections between  
21  
22 sexual minority density and cancer incidence. Methodological differences aside, there may be  
23  
24 real-world differences between California and the country as a whole in connections between  
25  
26 sexual minority density and cancer incidence.  
27  
28

29 This study has the inherent limitations of the ecologic study design. In particular, because  
30  
31 data are at the county level, it is not possible to link sexual minority status to cancer risk at the  
32  
33 level of the individual. Thus, our study findings clearly describe links between county-level  
34  
35 density measures and cancer incidence and should not be interpreted as evidence of an  
36  
37 association between individual sexual orientation and cancer incidence. A finer scale—for  
38  
39 example, at the level of the census tract—may provide more insight into patterns of sexual  
40  
41 minority density and cancer incidence, but it is not yet clear what is the most appropriate  
42  
43 geographic scale for such studies.  
44  
45  
46  
47

48 Despite these limitations, and some inconsistencies between ~~At present, there is~~  
49 ~~essentially no systematic surveillance of sexual minorities, other than simply reporting~~  
50 ~~differences in the prevalence of health risk factors.~~ The work described here and in our previous  
51  
52 analyses [21-23], a particular strength is that these ecological analyses pinpoints-identified the  
53  
54  
55  
56  
57  
58  
59  
60

1  
2  
3  
4  
5  
6  
7  
8  
9  
10  
11  
12  
13  
14  
15  
16  
17  
18  
19  
20  
21  
22  
23  
24  
25  
26  
27  
28  
29  
30  
31  
32  
33  
34  
35  
36  
37  
38  
39  
40  
41  
42  
43  
44  
45  
46  
47  
48  
49  
50  
51  
52  
53  
54  
55  
56  
57  
58  
59  
60

existence of public health-sexual orientation disparities in cancer incidence at the county level, while the consideration of gender minority density was outside of the scope of this study. Future studies are needed to identify ecological causes for the disparity in cancer incidence, which are likely complex, possibly examining county-level factors related to sexual minorities' access to the health care system and quality of care delivery. So far, a contextual understanding of sexual minorities' cancer incidence is lacking as well as knowledge about county or neighborhood effects on sexual minority populations' health and health behaviors more broadly. Nevertheless, ~~the~~ We suggest the consistency with which our ecological analyses identified disparities in cancer incidence, ~~are~~ is an opportunity for public health policy interventions, which are larger in scale, considering county-level programs, rather than interventions that focus on individual behavior change. We hope additional research can be performed to identify county-level factors, such as density of health care, the equality of health care for sexual minorities, along with other known cancer prevention behaviors, such as smoking, that may affect cancer incidence.

While there is an increasing attention to the collection of sexual orientation data in the context of state or federal health surveys, from which one can derive differences in the prevalence of health risk factors, at present, there is no systematic surveillance of sexual or gender minorities with respect to cancer. Because of this omission, our goal has been to examine the question about cancer disparities by sexual orientation using ecological analyses. Similarly, motivated by a lack of individual-level data on sexual orientation and cancer, a recent study analyzed data on women in same sex and opposite sex relationships, i.e., a proxy for sexual orientation, concluding that women in same-sex relationships have greater risk for breast cancer related mortality [36]. So far, evidence is accumulating that sexual minorities carry a disproportionate burden of cancer, therefore calls are growing louder that cancer registries and

SEER ought to collect sexual orientation data to adequately fulfill their mission of monitoring population health, which has to include sexual minority populations as well.

**Acknowledgments:** This work was supported by the National Cancer Institute at the National Institutes of Health (grant number 1 R03 CA153063-01).

**Conflict of interests:** None declared

**Data sharing agreement:** There is no additional data available.

**Contributor Statement:** U Boehmer originated the study and interpreted the findings. X Miao conducted the analyses and helped to interpret the findings. N Maxwell led the writing. A Ozonoff used his statistical expertise to direct the analysis and helped to interpret the findings. All authors contributed in significant ways to the final article by discussing earlier drafts, reviewing, and revising the manuscript.

## References

- 1 U.S. Cancer Statistics Working Group. United States Cancer Statistics: 1999–2008 Incidence and Mortality Web-based Report. . Atlanta, GA: Department of Health and Human Services, Centers for Disease Control and Prevention, and National Cancer Institute 2012.
- 2 IARC Working Group on the Evaluation of Cancer Preventive Strategies. *Weight Control and Physical Activity*. Lyon, France: IARC Press 2001.
- 3 Ryan H, Wortley PM, Easton A, *et al*. Smoking among lesbians, gays, and bisexuals: a review of the literature. *Am J Prev Med* 2001;**21**:142-9.
- 4 Tang H, Greenwood GL, Cowling DW, *et al*. Cigarette smoking among lesbians, gays, and bisexuals: how serious a problem? (United States). *Cancer Causes Control* 2004;**15**:797-803.
- 5 Burgard SA, Cochran SD, Mays VM. Alcohol and tobacco use patterns among heterosexually and homosexually experienced California women. *Drug Alcohol Depend* 2005;**77**:61-70.
- 6 The President's Cancer Panel. Promoting Healthy Lifestyles: Policy, Program, and Personal Recommendations for Reducing Cancer Risk. Annual Report 2006-2007. In: Panel TPsC, ed. Bethesda, MD: U.S. Department of Health and Human Services, 2007.
- 7 Lee JG, Griffin GK, Melvin CL. Tobacco use among sexual minorities in the USA, 1987 to May 2007: a systematic review. *Tob Control* 2009;**18**:275-82.
- 8 Duplicate. Adult health behaviors in different age cohorts by sexual orientation. *Am J Public Health* 2012;**102**:292-300.

- 1  
2  
3  
4  
5  
6  
7  
8  
9  
10  
11  
12  
13  
14  
15  
16  
17  
18  
19  
20  
21  
22  
23  
24  
25  
26  
27  
28  
29  
30  
31  
32  
33  
34  
35  
36  
37  
38  
39  
40  
41  
42  
43  
44  
45  
46  
47  
48  
49  
50  
51  
52  
53  
54  
55  
56  
57  
58  
59  
60
- 9 Cochran SD, Keenan C, Schober C, *et al.* Estimates of alcohol use and clinical treatment needs among homosexually active men and women in the U.S. population. *J Consult Clin Psychol* 2000;**68**:1062-71.
- 10 Cochran SD, Mays VM, Bowen D, *et al.* Cancer-related risk indicators and preventive screening behaviors among lesbians and bisexual women. *Am J Public Health* 2001;**91**:591-7.
- 11 Gilman SE, Cochran SD, Mays VM, *et al.* Risk of psychiatric disorders among individuals reporting same-sex sexual partners in the National Comorbidity Survey. *Am J Public Health* 2001;**91**:933-9.
- 12 Drabble L, Midanik LT, Trocki K. Reports of alcohol consumption and alcohol-related problems among homosexual, bisexual and heterosexual respondents: results from the 2000 National Alcohol Survey. *J Stud Alcohol* 2005;**66**:111-20.
- 13 Valanis BG, Bowen DJ, Bassford T, *et al.* Sexual orientation and health: Comparisons in the women's health initiative sample. *Arch Fam Med* 2000;**9**:843-53.
- 14 Case P, Bryn Austin S, Hunter DJ, *et al.* Sexual Orientation, Health Risk Factors, and Physical Functioning in the Nurses' Health Study II. *J Womens Health* 2004;**13**:1033-47.
- 15 Boehmer U, Bowen DJ. Examining factors linked to overweight and obesity in women of different sexual orientations. *Prev Med* 2009;**48**:357-61.
- 16 Boehmer U, Bowen DJ, Bauer GR. Overweight and obesity in sexual minority women: evidence from population-based data. *Am J Public Health* 2007;**97**:1134-40.
- 17 Deputy NP, Boehmer U. Determinants of body weight among men of different sexual orientation. *Prev Med* 2010;**51**:129-31.
- 18 Rankow EJ, Tessaro I. Mammography and Risk Factors for Breast Cancer in Lesbian and Bisexual Women. *American Journal of Health Behavior* 1998;**22**:403-10.



- 1  
2  
3 19 Kavanaugh-Lynch MHE, White E, Daling JR, *et al.* Correlates of lesbian sexual  
4 orientation and the risk of breast cancer. *J Gay Lesbian Med Assoc* 2002;**6**:91-5.  
5  
6  
7  
8 20 Dibble SL, Roberts SA, Nussey B. Comparing breast cancer risk between lesbians and  
9 their heterosexual sisters. *Womens Health Issues* 2004;**14**:60-8.  
10  
11  
12 21 Boehmer U, Ozonoff A, Timm A. County-level association of sexual minority density  
13 with breast cancer incidence: results from an ecological study. *Sex Res Social Policy* 2011;**8**:139-  
14 45.  
15  
16  
17  
18 22 Boehmer U, Ozonoff A, Miao X. An ecological analysis of colorectal cancer incidence  
19 and mortality: Differences by sexual orientation. *BMC Cancer* 2011;**11**:400.  
20  
21  
22  
23 23 Boehmer U, Ozonoff A, Miao X. An ecological approach to examine lung cancer  
24 disparities due to sexual orientation. *Public Health* 2012;**126**:605-12.  
25  
26  
27  
28 24 Steele LS, Ross LE, Dobinson C, *et al.* Women's sexual orientation and health: results  
29 from a Canadian population-based survey. *Women Health* 2009;**49**:353-67.  
30  
31  
32  
33 25 Brewster KL, Tillman KH. Sexual Orientation and Substance Use Among Adolescents  
34 and Young Adults. *Am J Public Health* 2012;**102**:1168-76.  
35  
36  
37  
38 26 Tjepkema M. Health care use among gay, lesbian and bisexual Canadians. *Health Rep*  
39 2008;**19**:53-64.  
40  
41  
42  
43 27 Kertzner RM, Meyer IH, Frost DM, *et al.* Social and psychological well-being in  
44 lesbians, gay men, and bisexuals: the effects of race, gender, age, and sexual identity. *Am J*  
45 *Orthopsychiatry* 2009;**79**:500-10.  
46  
47  
48  
49 28 Lee S, Brown ER, Grant D, *et al.* Exploring Nonresponse Bias in a Health Survey Using  
50 Neighborhood Characteristics. *Am J Public Health* 2009;**99**:1811-7.  
51  
52  
53  
54  
55  
56  
57  
58  
59  
60

- 1  
2  
3  
4 29 Singh G, Miller B, Hankey B, *et al.* Area Socioeconomic Variations in U.S. Cancer  
5 Incidence, Mortality, Stage, Treatment, and Survival, 1975–1999. *NCI Cancer Surveillance*  
6  
7 *Monograph Series*. Bethesda, MD: National Cancer Institute 2003.  
8  
9  
10 30 Krieger N, Chen JT, Waterman PD, *et al.* Painting a truer picture of US socioeconomic  
11 and racial/ethnic health inequalities: the Public Health Disparities Geocoding Project. *Am J*  
12  
13 *Public Health* 2005;**95**:312-23.  
14  
15  
16 31 Institute of Medicine. *The Health of Lesbian, Gay, Bisexual, and Transgender People:*  
17  
18 *Building a Foundation for Better Understanding*. Washington, DC: The National Academies  
19  
20 Press. 2011.  
21  
22  
23 32 Bauer GR, Jaram JA. Are lesbians really women who have sex with women (WSW)?  
24 Methodological concerns in measuring sexual orientation in health research. *Women Health*  
25  
26 2008;**48**:383-408.  
27  
28  
29 33 Fredriksen-Goldsen KI, Kim H-J, Barkan SE, *et al.* Disparities in Health-Related Quality  
30  
31 of Life: A Comparison of Lesbians and Bisexual Women. *Am J Public Health* 2010;**100**:2255-  
32  
33 61.  
34  
35  
36 34 Herek G, Norton A, Allen T, *et al.* Demographic, Psychological, and Social  
37  
38 Characteristics of Self-Identified Lesbian, Gay, and Bisexual Adults in a US Probability Sample.  
39  
40 *Sex Res Social Policy* 2010;**7**:176-200.  
41  
42  
43 35 Greenberg JA. Health Care Issues Affecting People with an Intersex Condition or DSD:  
44  
45 Sex or Disability Discrimination? *Loyola of Los Angeles Law Review* 2012;**45**:849.  
46  
47  
48 36 Cochran SD, Mays VM. Risk of Breast Cancer Mortality Among Women Cohabiting  
49  
50 with Same Sex Partners: Findings from the National Health Interview Survey, 1997-2003. *J*  
51  
52 *Women's Health* 2012;**21**:528-33.  
53  
54  
55  
56  
57  
58  
59  
60

1  
2  
3  
4  
5  
6  
7  
8  
9  
10  
11  
12  
13  
14  
15  
16  
17  
18  
19  
20  
21  
22  
23  
24  
25  
26  
27  
28  
29  
30  
31  
32  
33  
34  
35  
36  
37  
38  
39  
40  
41  
42  
43  
44  
45  
46  
47  
48  
49  
50  
51  
52  
53  
54  
55  
56  
57  
58  
59  
60

For peer review only

**Table 1** Multivariate Poisson Regression Analysis for *Male Lung Cancer*<sup>†</sup>

| Predictors                      | Regression coefficient estimate | IRR    | 95% CI of IRR |       | p-value |
|---------------------------------|---------------------------------|--------|---------------|-------|---------|
| Gay density                     | 0.0004                          | 1.0004 | 0.995         | 1.006 | 0.88    |
| Bisexual density                | -0.0875                         | 0.916  | 0.897         | 0.936 | <0.0001 |
| Hispanic vs. non-Hispanic white | -0.4243                         | 0.654  | 0.637         | 0.672 | <0.0001 |
| Asian/PI vs. non-Hispanic white | -0.0674                         | 0.935  | 0.910         | 0.960 | <0.0001 |
| Other vs. non-Hispanic white    | -0.0537                         | 1.055  | 1.025         | 1.086 | 0.0003  |
| Poverty                         | 0.0134                          | 1.014  | 1.012         | 1.015 | <0.0001 |

<sup>†</sup> results also adjusted for age

**Table 2** *Multivariate Poisson Regression Analysis for Male Colorectal Cancer†*

| Predictors                      | Regression coefficient estimate | IRR   | 95% CI of IRR |       | p-value |
|---------------------------------|---------------------------------|-------|---------------|-------|---------|
| Gay density                     | -0.0020                         | 0.998 | 0.993         | 1.003 | 0.45    |
| Bisexual density                | 0.0262                          | 1.027 | 1.004         | 1.050 | 0.02    |
| Hispanic vs. non-Hispanic white | 0.0411                          | 1.042 | 1.018         | 1.067 | 0.0006  |
| Asian/PI vs. non-Hispanic white | 0.1056                          | 1.111 | 1.082         | 1.142 | <0.0001 |
| Other vs. non-Hispanic white    | 0.0942                          | 1.099 | 1.065         | 1.134 | <0.0001 |
| Poverty                         | 0.0038                          | 1.004 | 1.002         | 1.006 | <0.0001 |

† results also adjusted for age

**Table 3** *Multivariate Poisson Regression Analysis for Female Lung Cancer*<sup>†</sup>

| Predictors                      | Regression coefficient estimate | IRR   | 95% CI of IRR |       | p-value |
|---------------------------------|---------------------------------|-------|---------------|-------|---------|
| Lesbian density                 | -0.0521                         | 0.949 | 0.928         | 0.971 | <0.0001 |
| Bisexual density                | 0.1067                          | 1.113 | 1.078         | 1.149 | <0.0001 |
| Hispanic vs. non-Hispanic white | -0.7012                         | 0.496 | 0.482         | 0.511 | <0.0001 |
| Asian/PI vs. non-Hispanic white | -0.5264                         | 0.591 | 0.573         | 0.609 | <0.0001 |
| Other vs. non-Hispanic white    | -0.1527                         | 0.858 | 0.832         | 0.885 | <0.0001 |
| Poverty                         | 0.0013                          | 1.001 | 0.999         | 1.003 | 0.18    |

<sup>†</sup> results also adjusted for age

**Table 4** *Multivariate Poisson Regression Analysis for Female Colorectal Cancer*<sup>†</sup>

| Predictors                      | Regression coefficient estimate | IRR   | 95% CI of IRR |       | p-value |
|---------------------------------|---------------------------------|-------|---------------|-------|---------|
| Lesbian density                 | -0.0290                         | 0.971 | 0.950         | 0.993 | 0.0095  |
| Bisexual density                | 0.0268                          | 1.027 | 0.994         | 1.062 | 0.1105  |
| Hispanic vs. non-Hispanic white | -0.0670                         | 0.932 | 0.909         | 0.957 | <0.0001 |
| Asian/PI vs. non-Hispanic white | 0.1133                          | 1.120 | 1.090         | 1.151 | <0.0001 |
| Other vs. non-Hispanic white    | 0.1616                          | 1.175 | 1.139         | 1.213 | <0.0001 |
| Poverty                         | 0.0020                          | 1.002 | 1.000         | 1.004 | 0.056   |

<sup>†</sup> results also adjusted for age

**Table 5** *Multivariate Poisson Regression Analysis for Female Breast Cancer†*

| Predictors                      | Regression coefficient estimate | IRR   | 95% CI of IRR |       | p-value |
|---------------------------------|---------------------------------|-------|---------------|-------|---------|
| Lesbian density                 | 0.0225                          | 1.023 | 1.014         | 1.031 | <0.0001 |
| Bisexual density                | -0.0328                         | 0.968 | 0.955         | 0.981 | <0.0001 |
| Hispanic vs. non-Hispanic white | -0.2691                         | 0.764 | 0.755         | 0.774 | <0.0001 |
| Asian/PI vs. non-Hispanic white | -0.1790                         | 0.836 | 0.824         | 0.848 | <0.0001 |
| Other vs. non-Hispanic white    | -0.2533                         | 0.776 | 0.763         | 0.790 | <0.0001 |
| Poverty                         | -0.0106                         | 0.990 | 0.989         | 0.991 | <0.0001 |

† results also adjusted for age



1  
2  
3  
4  
5  
6  
7  
8  
9  
10  
11  
12  
13  
14  
15  
16  
17  
18  
19  
20  
21  
22  
23  
24  
25  
26  
27  
28  
29  
30  
31  
32  
33  
34  
35  
36  
37  
38  
39  
40  
41  
42  
43  
44  
45  
46  
47  
48  
49  
50  
51  
52  
53  
54  
55  
56  
57  
58  
59  
60

Figure1. Comparing results for different sexual minority density measures

|                         | Same-sex Density | Lesbian/Gay Density | Bisexual Density |
|-------------------------|------------------|---------------------|------------------|
| Lung Cancer Men         | ↑                | not sig             | ↓                |
| Colorectal Cancer Men   | ↑                | not sig             | ↑                |
| Lung Cancer Women       | ↓                | ↓                   | ↑                |
| Colorectal Cancer Women | ↑                | ↓                   | not sig          |
| Breast Cancer Women     | ↑                | ↑                   | ↓                |

For peer review only

1  
2  
3  
4  
5  
6  
7  
8  
9  
10  
11  
12  
13  
14  
15  
16  
17  
18  
19  
20  
21  
22  
23  
24  
25  
26  
27  
28  
29  
30  
31  
32  
33  
34  
35  
36  
37  
38  
39  
40  
41  
42  
43  
44  
45  
46  
47  
48  
49  
50  
51  
52  
53  
54  
55  
56  
57  
58  
59  
60

|                         | Same-sex Density | Lesbian/Gay Density | Bisexual Density |
|-------------------------|------------------|---------------------|------------------|
| Lung Cancer Men         | ↑                | not sig             | ↓                |
| Colorectal Cancer Men   | ↑                | not sig             | ↑                |
| Lung Cancer Women       | ↓                | ↓                   | ↑                |
| Colorectal Cancer Women | ↑                | ↓                   | not sig          |
| Breast Cancer Women     | ↑                | ↑                   | ↓                |

87x38mm (144 x 144 DPI)

Peer review only
